# Supplementary material
Source: publisher site journal article supplement (https://www.degruyterbrill.com/publication/isbn/9783839463253/downloadAsset/9783839463253_Leseprobe.pdf)
Supplement: Supplementary file 1 [file 9783839463253_Leseprobe.pdf]

Silja Klepp, Jonas Hein (Hg.)

# UMWELTGERECHTIGKEIT UND SOZIALÖKOLOGISCHE TRANSFORMATION

Konflikte um Nachhaltigkeit  
im deutschsprachigen Raum

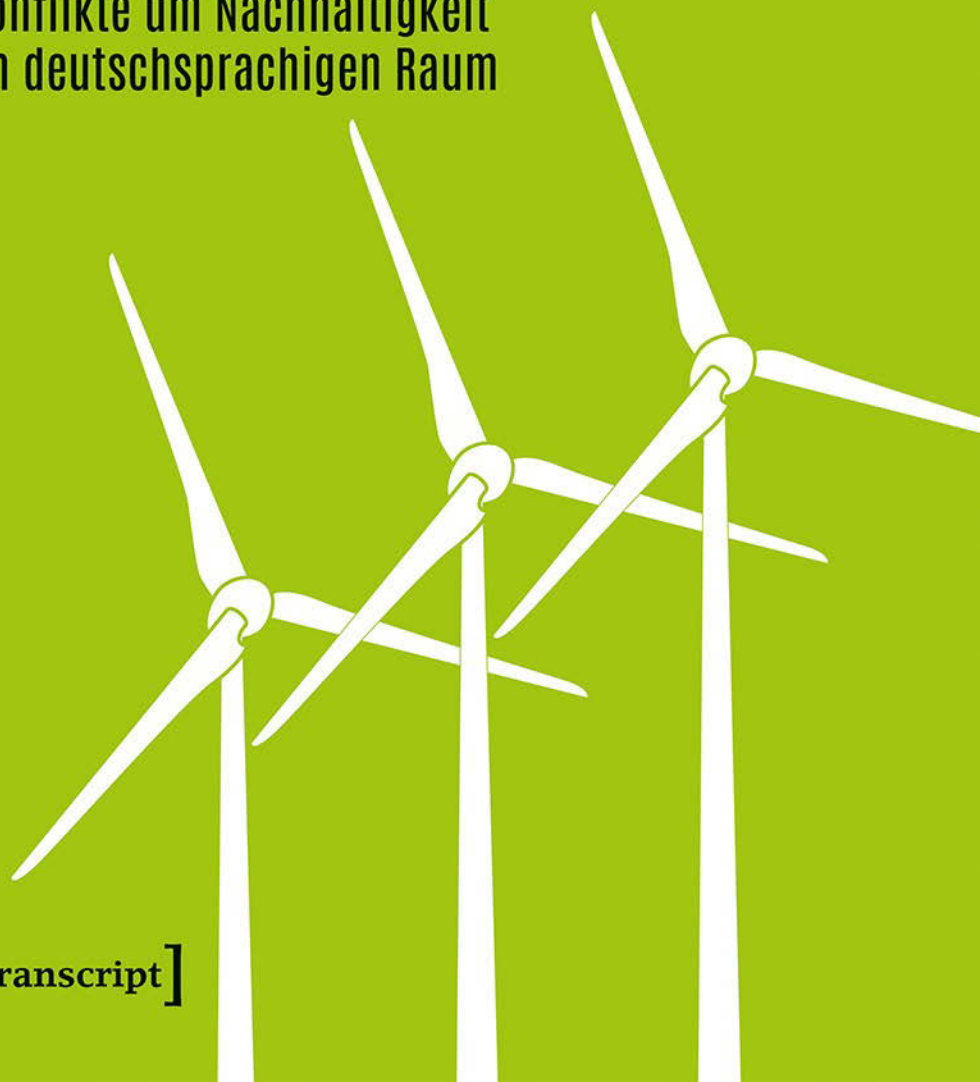

[transcript]

**Aus:**

*Silja Klepp, Jonas Hein (Hg.)*

## **Umweltgerechtigkeit und sozialökologische Transformation** Konflikte um Nachhaltigkeit im deutschsprachigen Raum

November 2023, 336 S., kart., 5 SW-Abb., 6 Farbbabb.

35,00 € (DE), 978-3-8376-6325-9

E-Book: kostenlos erhältlich als Open-Access-Publikation

PDF: ISBN 978-3-8394-6325-3

Die sozialökologische Transformation ist in aller Munde. Dies gilt sowohl für die politischen Debatten wie auch für die Wissenschaft. Dabei wird zunehmend deutlich: Multiple Krisen lassen sich nicht mehr nur mit Hilfe schrittweiser (Umwelt-)Politiken lösen, sondern es sind strukturelle Veränderungen notwendig. Die Beiträger\*innen des Bandes arbeiten Gerechtigkeitsfragen und die gesellschaftspolitische Brisanz ökologischer Verteilungskonflikte im Kontext der Transformation heraus. Durch ihre Analysen unter Bezugnahme auf unterschiedliche Dimensionen von Umweltgerechtigkeit machen sie diese greifbar und liefern Kontextwissen für eine längst überfällige Diskussion.

**Silja Klepp** ist Professorin für Humangeographie an der Christian-Albrechts-Universität zu Kiel und Inhaberin des UNESCO Lehrstuhls für Integrierte Meereswissenschaft. Ihre Lehre und Forschung beziehen sich auf Mensch-Umwelt-Beziehungen im Anthropozän, vor allem auf die sozialen Folgen des Klimawandels, Fragen von Umweltgerechtigkeit und sozialökologischer Transformation. Sie ist Mitgründerin des EnJust-Netzwerkes Umweltgerechtigkeit. Silja Klepp arbeitet u.a. mit transdisziplinären Ansätzen und künstlerischer Forschung, um inklusive und kreative Wege für die Wissenschaft zu finden.

**Jonas Hein** ist promovierter Humangeograph und Senior Researcher am German Institute of Development and Sustainability (IDOS) in Bonn. Er leitete zusammen mit Silja Klepp die Arbeitsgruppe »Umweltgerechtigkeit – die soziale und politische Dimension von Umweltkonflikten« im Rahmen des Gesellschaftswissenschaftlichen Kollegs VIII der Studienstiftung des deutschen Volkes. In seiner Forschung beschäftigt er sich mit den Gerechtigkeitsimplikationen von globalen Umweltpolitiken, der politischen Ökologie des Naturschutzes und den sozialökologischen Auswirkungen von Infrastrukturprojekten in Küstenregionen. Zudem ist Jonas Hein Mitbegründer des EnJust-Netzwerkes Umweltgerechtigkeit.

Weitere Informationen und Bestellung unter:  
[www.transcript-verlag.de/978-3-8376-6325-9](http://www.transcript-verlag.de/978-3-8376-6325-9)

© 2023 transcript Verlag, Bielefeld

# Inhalt

---

|                                                                                                        |     |
|--------------------------------------------------------------------------------------------------------|-----|
| <b>Umweltgerechtigkeit und sozialökologische Transformation</b>                                        |     |
| Konflikte um Nachhaltigkeit im deutschsprachigen Raum                                                  |     |
| <i>Silja Klepp &amp; Jonas Hein</i> .....                                                              | 7   |
| <b>Multipel, komplex und oft übersehen</b>                                                             |     |
| Gerechtigkeit(en) in Beteiligungsverfahren                                                             |     |
| <i>Stefanie Baasch</i> .....                                                                           | 45  |
| <b>Umkämpfte Gerechtigkeit</b>                                                                         |     |
| Konflikte zwischen Gewerkschaften und Klimabewegung beim Kohleausstieg                                 |     |
| <i>Tobias Kalt</i> .....                                                                               | 65  |
| <b>Umsiedlungen im Rheinischen Braunkohletagebau</b>                                                   |     |
| Eine Frage der Umweltgerechtigkeit?                                                                    |     |
| <i>Lukas Beckmann &amp; Helene Helix Heyer</i> .....                                                   | 89  |
| <b>Power to which people?</b>                                                                          |     |
| Energiegerechtigkeit und <i>ownership</i> -Strukturen in Energiegenossenschaften                       |     |
| <i>Quirin Rieder, Konstantin Veit, Nikolaj Moretti, Luis Peters &amp; Celine Li</i> .....              | 117 |
| <b>Zeit für Natürliche Klimälösungen</b>                                                               |     |
| Zeit als Dimension der Umweltgerechtigkeit am Beispiel der Wiedervernässung der Hannoverschen Moorgest |     |
| <i>Tabea Dorndorf</i> .....                                                                            | 145 |

## **Klimaschutz und Gender in der kommunalen Praxis**

Am Beispiel des Klimaschutzkonzeptes der Stadt Duisburg

*Verena Fisch, Juliane Frost & Alena Dietl* ..... 177

## **Der Hamburger Hafen im Wachstumszwang**

Das Hafenerweiterungsgebiet als Territorium der (Un)Gerechtigkeit?

*Nils Hilder & Jonas Hein* ..... 207

## **Wem gehören Grünflächen?**

Nutzungskonflikte und Gerechtigkeitsvorstellungen in Frankfurt a.M.,  
einer wachsenden deutschen Großstadt

*David Paul Wirtz, Gianluca Cavallo & Paul Günter Schmidt* ..... 235

## **Ländliche Gentrifizierung und Konflikte um Umweltgerechtigkeit**

Das Beispiel der Chalet-Dörfer in Österreich

*Michael Mießner & Matthias Naumann* ..... 259

## **Umweltgerechtigkeit als integrierter Ansatz zur Schaffung gesundheitlicher Chancengleichheit**

Konzept, empirische Befunde, strategische Überlegungen und ein Fallbeispiel

*Christiane Bunge* ..... 279

## **Gerechte Wege zur sozialökologischen Transformation?!**

Ein Trialog zwischen Sybille Bauriedl, Jonas Hein und Silja Klepp

*Sybille Bauriedl, Jonas Hein & Silja Klepp* ..... 307

**Autor:innen** ..... 331

# Umweltgerechtigkeit und sozialökologische Transformation

## Konflikte um Nachhaltigkeit im deutschsprachigen Raum

---

Silja Klepp & Jonas Hein

### Umkämpfte Wege zur sozialökologischen Transformation. Eine Einführung

Die Auswirkungen der multiplen Krisen, die vor allem durch unsere ökologisch und sozial nicht nachhaltigen Wirtschafts- und Lebensweisen verursacht werden (Brand/Wissen 2017a), haben heute auch den ›globalen Norden‹<sup>1</sup> erreicht. Die Notwendigkeit einer sozialökologischen Transformation wird deshalb auch im deutschsprachigen Raum zunehmend diskutiert. Die sozialökologische Transformation wird in diesem Kontext häufig als *normativer, strategischer und zielorientierter Prozess* verstanden (Brand 2016). Hier ist vor allem der Umbau unserer Strukturen hin zu einer Gesellschaft, die wenig bis gar kein CO<sub>2</sub> ausstößt, Ressourcen schont und soziale Gerechtigkeit anstrebt, gemeint. Das deutsche *Umweltbundesamt* führt aus: »Eine erfolgreiche Nachhaltigkeits-transformation beinhaltet strukturelle und paradigmatische Veränderungen der Gesellschaft« (Wittmayer/Hölscher 2017: 13). Der *Wissenschaftliche Beirat Globale Umweltveränderungen* der deutschen Bundesregierung (WBGU 2011: 5) spricht von einem »nachhaltigen weltweiten Umbau von Wirtschaft und Gesellschaft« und grenzt diese erwünschte Transformation von den »weitgehend ungesteuerte[n] Ergebnissen evolutionären Wandels« (WBGU 2011: 5) ab. Dies impliziert die Frage, ob es uns kurzfristig gelingt, Transformation gemeinsam als Gesellschaft proaktiv zu steuern (*transformation by design*) oder ob es aufgrund der multiplen ökologischen Krisen (Rockström 2009) zu einem unkontrollierten und eventuell katastrophischen Wandel kommt (*transformation by disaster*) (Sommer/Welzer 2014). Während die Einsicht in die Notwendigkeit der Transformation wächst, sind die Gestaltung und das letztliche Ziel dieses

Wandels jedoch gesellschaftlich umkämpft (Adloff/Neckel 2020). Vor allem die Frage, ob und welche strukturellen Veränderungen und sozialen Innovationen erforderlich sind, oder ob nur kleinere Änderungen in der (Umwelt-)Politik und der Einsatz von technischen Lösungen ausreichen, ist umstritten (Brand/Wissen 2017b; Görg et al. 2017; Nightingale et al. 2020). Bedeutet ökologische Modernisierung durch technische Neuerungen auch Transformation? Oder kann durch ökologische Modernisierung kein systematischer Wandel erzeugt werden, insbesondere wenn die soziale Verträglichkeit von Politiken nicht mitgedacht wird? Diese Fragen deuten auf unterschiedliche Vorstellungen und Narrative von Transformation hin. Diese werden wir unten ausführlicher diskutieren.

Neben der *normativen, strategischen und zielorientierten* Sicht auf Transformation wird der Transformationsbegriff auch *analytisch* gefasst. Vor allem die Politische Ökologie nutzt überwiegend ein analytisches Transformationsverständnis. Ausgangspunkt sind dabei zwei Überlegungen: Erstens, dass alle lebendigen Organismen inklusive des Menschen, bspw. durch den Einsatz ihrer Arbeitskraft, fortlaufend ihre Umwelt transformieren (Swyngedouw/Heynen 2003: 904). Zweitens zeichnen sich kapitalistische Gesellschaften durch permanenten sozialökologischen Wandel und der Aneignung von Ressourcen aus und sichern so den Fortbestand des industriellen Kapitalismus (Brand/Wissen 2017a). Der sozialökologische Wandel ist folglich systemimmanent und vor allem die sozialen Bedingungen und Machtverhältnisse, die die Aneignung von Natur und deren Transformation ermöglichen, sind von Interesse (Swyngedouw/Heynen 2003), da diese eine mögliche nachhaltige Entwicklung verhindern (Brand/Wissen 2017a; Peet/Robbins/Watts 2011). So zeichnen sich bislang die existierenden sozialökologischen Transformationsprozesse durch ständig wachsenden Ressourcenverbrauch und Treibhausgasemissionen und den Zugriff auf Kohlenstoffsenken aus. Auch die sogenannte Externalisierung von sozialen und ökologischen Kosten vor allem in den »globalen Süden«, also der Umstand, dass der Wohlstand im »globalen Norden« und einer globalen Mittelklasse auf Ausbeutung von Arbeiter:innen und der Umwelt vor allem im »globalen Süden« beruht, weist auf eine »Gleichursprünglichkeit« (Biesecker/Hofmeister 2013: 241) hin, die die heutige systemisch angelegte sozialökologische Krise kennzeichnet und herbeigeführt hat (Christ/Sommer 2022). Der Begriff der »Gleichursprünglichkeit« (Biesecker/Hofmeister 2013: 241) unterstreicht, dass es sich sowohl um eine ökologische wie auch eine soziale Krise handelt, die auf Ausbeutung beruht. Damit einher geht die Abwertung von *care*- und Reproduktionsarbeit, die oftmals unsichtbar gemacht wird,

weiblich konnotiert ist und gesellschaftlich nicht anerkannt wird. Die heutige sozialökologische Krise ist also auf verschiedenen Ebenen tief in unsere sozialen und kulturellen Strukturen eingeschrieben und greift wesentlich weiter als die Vorstellung einer ökologischen Krise. Die logische Folge aus diesem Umstand bedeutet, dass auch die Lösungen der Krise und eine sozialökologische Transformation systemisch tiefgreifend angelegt werden müssen.

Mit sozialökologischen Transformationen wie auch mit den Auswirkungen der sozialökologischen Krise, also bspw. häufigeren Extremwetterereignissen wie Hitzewellen und Überschwemmungen, sind vielfältige Gerechtigkeitsfragen verbunden. Menschen sind dafür in unterschiedlichem Maße verantwortlich und betroffen. Derzeit entstehen im deutschsprachigen Raum verschiedene Maßnahmen, die eine nachhaltige oder postfossile Wirtschaftsordnung zum Ziel haben. Politiken zum Klimaschutz und zur Klimawandelanpassung werden von der kommunalen bis hin zur nationalen und europäischen Ebene formuliert und durchgeführt. Die sozialökologische Transformation erscheint so dringlich und relevant, dass Klimaschutz- und Klimaanpassungsinstrumente in nahezu alle politischen Sektoren eingeschrieben werden. Es erfolgt also ein sogenanntes *mainstreaming*. Diese Entwicklungen werden bspw. durch das deutsche Bundes-Klimaschutzgesetz (in Kraft seit 01.01.2020, Novellierung 2021) oder das österreichische Klimaschutzgesetz (in Kraft 2011–2020, Novellierung steht aus) auch rechtlich gerahmt. Im Kontext der sozialökologischen Transformation werden dabei neue Politiken und Maßnahmen entwickelt, die ganz eigene Dynamiken entwickeln können (Klepp/Chavez-Rodriguez 2018; Mendes Barbosa/Walker 2020). Soziale Fragen sind damit eng verknüpft. Wie gestalten sich bspw. die Folgen des Umbaus des Energiesektors? Oder welche Auswirkungen hat es, wenn ein Gebiet entlang eines Flusses zur Risikozone erklärt und die anliegenden Häuser nicht mehr versichert oder sogar abgerissen werden sollen?

Die Berücksichtigung von Gerechtigkeitsfragen in den konkreten Politiken der Transformation ist unerlässlich. Auch im »globalen Norden« werden durch den Umbau des Energiesektors, den Ausstieg aus der Kohle oder die Inwertsetzung von städtischer und ländlicher Natur die Lebensrealitäten der von Einkommensarmut betroffenen Personen, Arbeiter:innen in energieintensiven Industriezweigen oder Mieter:innen besonders negativ beeinflusst (Sander/Weißermel 2023). Die ungleich verteilten Kosten der Transformation und damit verbundene Gerechtigkeitsaspekte müssen deshalb sichtbar gemacht, kritisch analysiert und gesamtgesellschaftlich diskutiert und ausgehandelt

werden. Dies ist für ein Gelingen der sozialökologischen Transformation im Sinne einer Gesellschaft, die solidarisch ist und die wichtige Bedeutung von gesellschaftlichem Zusammenhalt gerade in Krisenzeiten erkennt, zentral.

Der Begriff der Transformation hat, wie oben beschrieben, normatives, also ethisch wertendes, wie auch analytisches Potenzial. Dies gilt auch für Perspektiven der Umweltgerechtigkeit. Umweltgerechtigkeit verbindet sowohl als soziale Bewegung wie auch als analytische Perspektive grundlegend soziale und ökologische Dimensionen und ist daher geeignet, gesellschaftliche wie auch wissenschaftliche Debatten voranzubringen. Der Sammelband arbeitet die gesellschaftspolitische Brisanz aktueller Debatten und Politiken zur sozialökologischen Transformation heraus und analysiert sie mit Hilfe unterschiedlicher Dimensionen von Umweltgerechtigkeit. Die politischen, sozialen und kulturellen Aspekte von Umweltkonflikten, die oft gesellschaftlich neutral erscheinen und häufig ausschließlich natur- und ingenieurwissenschaftlich gerahmt werden (Muraca 2020), werden so sichtbar. Die Fallstudien des Sammelbands greifen dabei sowohl Initiativen und Projekte auf, die aus Sicht der beteiligten Akteur:innen zur sozialökologischen Transformation und damit zu einer nachhaltigeren und gerechteren Gesellschaft beitragen sollen, als auch Aushandlungsprozesse um Barrieren für eine Transformation und Pfadabhängigkeiten. Es zeigt sich, dass sozialökologische Transformationsprozesse nicht zwangsläufig zu einer nachhaltigeren Entwicklung führen, sondern auch gegenläufige Prozesse, wie nicht intendierte negative soziale Folgen von Klimapolitiken, umfassen (Horstmann/Hein 2017; Klepp/Hein 2021). Der Sammelband umfasst Fallstudien zur Ausweitung von Moorschutzgebieten als Maßnahme zum Schutz von Klima und Biodiversität, zur Umsiedlung und der Auflösung von Dörfern im rheinischen Braunkohlerevier, zu Konflikten um den Erhalt städtischer Grünflächen, zur möglichen Erweiterung des Hamburger Hafens oder zur Rolle von Energiegenossenschaften für die Energiewende. Die Fallstudien machen neben zentralen Akteur:innen und Handlungslogiken vor allem Gerechtigkeitsfragen und die in Transformationsprozesse eingeschriebenen Machtasymmetrien greifbar. Damit trägt der Sammelband zu einem besseren Verständnis und einer kritischen Analyse von Gerechtigkeitsaspekten bei, die die gesellschaftlichen Veränderungen durch die sozialökologische Transformation mit sich bringen. Das Buch möchte dabei ganz bewusst sowohl einen normativen wie auch einen analytischen Beitrag zur Diskussion um sozialökologische Transformation(en) und Umweltgerechtigkeit im deutschsprachigen Raum leisten.



In vielen Foren auf der internationalen politischen Ebene steht die sozial-ökologische Transformation im Zentrum der Aufmerksamkeit. Sie wird in Abkommen und politischen Agenden wie den Nachhaltigkeitszielen (*Sustainable Development Goals*, kurz: SDGs), der *Agenda 2030* für eine nachhaltige Entwicklung der Vereinten Nationen, dem Pariser Klimaabkommen (*The Paris Agreement*), dem *Green New Deal* der EU oder dem kürzlich verabschiedeten Kunming-Montreal Rahmenabkommen zum Schutz der Natur (*Kunming-Montreal Global Biodiversity Framework*) des Übereinkommens zur biologischen Vielfalt aufgegriffen. Wie radikal und strukturell tiefgreifend gesellschaftliche Transformationen dabei vorangebracht werden sollen, bleibt allerdings auch hier oft vage und ist Gegenstand von Aushandlungsprozessen, wie sie in den UN-Klimaverhandlungen und den Verhandlungen im Rahmen des UN-Übereinkommens zur biologischen Vielfalt zu beobachten sind. Hier spielen Fragen der Umweltgerechtigkeit und Fragen der Klimagerechtigkeit eine große Rolle: Welche sozialen Gruppen sind bspw. von der Neuausweisung von Naturschutzgebieten, um bis ins Jahr 2030 30 % aller terrestrischen und marinen Ökosysteme unter Schutz zu stellen, besonders betroffen (Ziel 3 des *Kunming-Montreal Global Biodiversity Framework*)? Und wer profitiert davon? Klimagerechtigkeit bezeichnet den Umstand, dass diejenigen Länder schon heute am stärksten vom Klimawandel betroffen sind, die historisch am wenigsten emittiert haben. Dies betrifft vor allem Länder im »globalen Süden«, die zudem finanziell weniger Mittel zur Anpassung haben. Aspekte von Klimagerechtigkeit werden in ihrer globalen Dimension demzufolge vielfach sichtbar gemacht und diskutiert, wenn auch wenig berücksichtigt (Pottier et al. 2017). Zudem kann sozialökologische Transformation im »globalen Norden« vielfältige »neue Geographien der Ungleichheit im Globalen Süden reproduzieren« (Bruns 2020: 242) und verursachen, bspw. durch die Auslagerung der Produktion von Wasserstoff (Müller/Tunn/Kalt 2022). Doch wie sieht es mit Klimagerechtigkeit innerhalb der Gesellschaften Europas oder des deutschsprachigen Raumes aus? Wer ist hier von den Auswirkungen des Klimawandels oder des Biodiversitätsverlustes besonders betroffen? Und wer trägt die negativen Folgen der Politiken zum Klimaschutz und zur Klimaanpassung oder profitiert hingegen davon? Wer sind also die Verlierer:innen der sozialökologischen Krise in den reicheren, westlichen Industrieländern?

Oft erscheinen Verursacher:innen und Opfer des anthropogenen Klimawandels als homogenes Kollektiv, als *die* Menschheit des Anthropozäns (Laux 2020). Szenarien und Modellierungen zu den Entwicklungen des Klimawandels, Diskussionen um die nationale Reduktion von CO<sub>2</sub>, wie sie in

den Weltklimaverhandlungen geführt werden, aber auch teilweise die Debatte um das Anthropozän selbst, die auf die heute so wirkmächtige Rolle des Menschen in den Mensch-Umweltbeziehungen hinweist, tragen zu dieser Homogenisierung und Entpolitisierung bei (Baldwin/Erickson 2020). Perspektiven der Umweltgerechtigkeit zeigen hingegen, dass sozialökologische Krisen wie der Klimawandel und unsere Reaktionen darauf zutiefst politisch und von unterschiedlichen Machtverhältnissen durchzogen sind. Debatten um politische Maßnahmen und *governance*-Instrumente der sozialökologischen Transformation sind sehr wirkmächtig. Der Bau neuer Infrastrukturen wie Windkraftanlagen oder Elektrolyseure für grünen Wasserstoff, oder auch die Ausweisung von Risikogebieten oder neuen Natur- und Klimaschutzgebieten haben vielfältige Auswirkungen. Dabei wird im Kontext des voranschreitenden Klimawandels oftmals mit Dringlichkeit, der Gefährdung der öffentlichen Sicherheit, der Energiesicherheit und einem offensichtlichen Nutzen der (zumeist technischen) Maßnahmen argumentiert (Herbeck/Flitner 2010; Klepp/Fünfgeld 2022; Nightingale et al. 2020). Prozesse der Beteiligung an politischen Entscheidungen können mit diesen Argumenten der Versicherheitlichung oder der Dringlichkeit verkürzt oder ausgehebelt werden (Baasch, dieser Band: 45-64). Das Risiko, dass Politiken, die die ökologische Transformation unterstützen sollen, soziale Fragen aufgrund dieser sehr gesellschaftsfähigen Narrative vernachlässigen, ist groß.

Die Analysen der Wissenschaft richten sich deshalb mehr und mehr auf ungerechte Folgen von Umweltpolitiken (Hein 2019; Hein/Dünckmann 2020; Klepp/Chavez-Rodriguez 2018; Klepp/Fröhlich 2020). Das kritische Hinterfragen dieser teilweise neuen Politiken und Regierungspraktiken, die vordergründig eine sozialökologische Transformation im deutschsprachigen Raum vorantreiben, ist deshalb unerlässlich. Ebenso sollten politische Prozesse und auch Akteur:innen auf unterschiedlichen Ebenen in den Blick genommen werden, die sozialökologische Transformation und soziale Innovation ausbremsen oder verhindern.

In unserem Band sind die Schwierigkeiten bei der Umsetzung von Umweltgerechtigkeit in Städten (Bunge, dieser Band: 279-306), bei der Integration von Genderfragen in kommunale Klimaanpassungsmaßnahmen (Fisch/Frost/Dietl, dieser Band: 177-206), bei der Einrichtung von Moorschutzgebieten oder von Grünflächen zum Klimaschutz (Dorndorf, dieser Band: 145-175; Wirtz/Cavallo/Schmidt, dieser Band: 235-257) konkrete Beispiele für diese politischen Prozesse. Die folgenden Kapitel zeigen, wie Transformation lokal und regional umgesetzt und ausgehandelt wird. Welche Auswirkungen haben

sozialökologische Transformation(en) auf die Lebenswelten der Menschen vor Ort und welche Akteur:innen und Handlungslogiken wirken dabei? Welche Strategien verfolgen bspw. mächtige privatwirtschaftliche Akteur:innen, um Einfluss auf Politiken in Regionen zu nehmen, die von Strukturwandel durch den Kohleausstieg betroffen sind (Beckmann/Heyer, dieser Band: 89-116; Kalt, dieser Band: 65-88)? Was heißt dabei gerechter Strukturwandel und mit welchen Protestformen wird dafür gekämpft (Beckmann/Heyer, dieser Band: 89-116; Kalt, dieser Band: 65-88)? Immer wieder zeigen die Autor:innen dabei auch ganz neue Wege und Allianzen auf, die sozialökologischen Wandel vorantreiben (Wirtz/Cavallo/Schmidt, dieser Band: 235-257; Beckmann/Heyer, dieser Band: 89-116). Besonders spannend sind in unseren Augen auch die Verschiebungen in gesellschaftlichen Debatten, die durch die Kapitel aufgezeigt und von den Autor:innen ausgelotet werden: Was bedeutet individuelle und kollektive Freiheit oder Verantwortung in Zeiten der sozialökologischen Krise? Zumal wir es mit einer Krise zu tun haben, die in den nächsten Jahren nicht im gängigen Sinne ›überwunden‹ werden kann. Da die kapitalistisch geprägte Normalität uns in die Krise geführt hat, können die derzeitigen multiplen Krisen auch nicht in ein oder zwei Generationen überwunden werden. Daher gibt es kein Zurück in eine systemimmanente ›Normalität‹.

## Warum Umweltgerechtigkeit?

Die Kapitel zeigen neben den konkreten Aushandlungsprozessen auch, dass Gerechtigkeitsfragen und soziale Innovation für das Gelingen einer sozialökologischen Transformation von zentraler Bedeutung sind. Diese Gerechtigkeitsfragen, Machtverschiebungen und Konflikte werden im deutschsprachigen Raum noch viel zu selten öffentlich debattiert. Die Perspektive der Umweltgerechtigkeit spielt im aktuellen Diskurs eher eine untergeordnete Rolle, obwohl diese die Aushandlungsprozesse und sozialen Kämpfe, die die sozialökologische Transformation begleiten und teilweise erst ermöglichen, in den Vordergrund stellt. Sozialökologische Transformationsprozesse verändern dabei immer Mensch-Umwelt-Beziehungen und folglich den Zugang unterschiedlicher Akteur:innen zu natürlichen Ressourcen wie Land, Wasser und landschaftlicher Schönheit. Sie werfen dabei immer gesellschaftliche, gruppenspezifische und individuelle Gerechtigkeitsfragen auf. Viele aktuelle soziale Bewegungen wie die Aktivist:innen von *Fridays for Future*, *Letzte Generation*, *Ende Gelände* oder der Widerstand gegen Fahrrinnenanpassung

und Hafenerweiterung in Hamburg (z.B. *Aktionsbündnis Lebendige Tideelbe*) haben hier ihren Ausgangspunkt und verdeutlichen, dass Transformationsprozesse gesellschaftlich umkämpft sind. Diese Kämpfe von Bürger:innen, Aktivist:innen oder auch Landwirt:innen gegen nicht nachhaltige Praktiken und Umweltzerstörung durch Staaten und Unternehmen können mit Hilfe der Perspektive der Umweltgerechtigkeit systematisch nach Aspekten wie Verteilungsgerechtigkeit, Partizipation der betroffenen Akteur:innen und nach Fragen der Anerkennungsgerechtigkeit, also bspw. welche Expert:innen in Konflikten gehört werden, analysiert und trotz ihrer Komplexität greifbar gemacht werden.

Umweltgerechtigkeit als politische Forderung bzw. die englischsprachige Forderung nach *environmental justice* geht im Wesentlichen auf die afroamerikanische Bürgerrechtsbewegung und die *racial justice* Bewegung in den Vereinigten Staaten zurück. Ausgangspunkt waren Proteste gegen Sondermülldeponien und gegen andere Formen unerwünschter Landnutzung, die sich überproportional häufig in der Umgebung von Wohngebieten mit einem hohen Anteil afroamerikanischer, *Native Americans*, oder hispanischer Bevölkerungsgruppen befanden (Bullard 1994; Cutter 1995; Flitner 2018; Schlosberg/Collins 2014). Auch die akademische Auseinandersetzung mit dem Thema begann zunächst mit Arbeiten, die die überproportionale Häufung von unerwünschten Landnutzungen bestätigten und Umweltungerechtigkeiten aufzeigten (Flitner 2003). Ihr Fokus lag damit auf der Verteilungsgerechtigkeit, also dem Umstand, dass bspw. Deponien und andere Infrastrukturen, die gesundheitsgefährdende Umweltbelastungen auslösen können, häufig in Nachbarschaften gebaut werden, in denen benachteiligte Bevölkerungsgruppen leben. Im deutschsprachigen Raum deuten insbesondere sozial- und umweltepidemiologische Studien (Bunge, dieser Band: 279-306) auf einen Zusammenhang zwischen sozioökonomischen, soziodemographischen Faktoren, Ethnizität und der Exposition von Wohnort und Arbeitsplatz gegenüber Umweltbelastungen hin (Köckler/Sieber 2020; Raddatz/Mennis 2013; Rüttenauer 2018). Schwerpunkt dieser und weiterer Arbeiten sind Untersuchungen, die die soziale Lage verschiedener Bevölkerungsgruppen mit Umweltbelastungen aber auch breiteren Fragen der sozialen Gerechtigkeit in Verbindung bringen (Flitner 2018). Umweltgerechtigkeit laut Flitner (2018: 2685) »kann als Kurzformel für den Anspruch stehen, dass alle Menschen und sozialen Gruppen einen gleichwertigen Zugang zu Umweltgütern haben und zugleich von Umweltschäden nicht unproportional betroffen sind«. Damit unterscheiden

sich sowohl die Forschung, Aktivismus und politische Praxis von Fragen des Umwelt- und Naturschutzes.

Heute wird das Konzept der Umweltgerechtigkeit meist dreidimensional aufgefasst. Ein Großteil der empirischen Studien zu Umweltkonflikten versucht durch eine Auseinandersetzung mit prozeduralen Gerechtigkeitsfragen und Fragen der Anerkennungsgerechtigkeit Verteilungs(un)gerechtigkeiten zu erklären. Die prozedurale Gerechtigkeitsdimension stellt die Fähigkeit von Akteur:innen, Zugang zu Umweltinformationen zu erhalten und an Planungs- und politischen Entscheidungsprozessen mitzuwirken, in den Vordergrund. Ausgangspunkt ist hier die Überlegung, dass demokratische Teilhabe eine Grundvoraussetzung für Verteilungsgerechtigkeit ist (Schlosberg 2007; Walker 2012). Allerdings sind prozedurale Ungerechtigkeiten laut Walker (2012) nicht nur eine mögliche Erklärung für die ungleiche räumliche Verteilung von Umweltrisiken, sondern auch Gegenstand von Auseinandersetzungen und Gerechtigkeitsforderungen. Als ungerecht, intransparent oder exklusiv empfundene Planungs-, Entscheidungs- und Beteiligungsprozesse, z.B. zur Durchführung von Umsiedlungen (z.B. im Kontext des Braunkohlebergbaus, siehe Beckmann/Heyer, dieser Band: 89-116, oder der Hafenerweiterung; Hilder/Hein, dieser Band: 207-233), können ähnlich wie materielle Ungleichverteilungen Konflikte auslösen. Umkämpft ist häufig die Frage, wer an Entscheidungen mitwirken darf, wer Entscheidungen juristisch anfechten kann und ob von Maßnahmen Betroffene über ausreichend Ressourcen verfügen, um sich in Beteiligungsprozesse einbringen zu können (dazu weiterführend Baasch, dieser Band: 45-64).

Welche Akteur:innen sich in Beteiligungsprozesse einbringen können und wessen Interessen in Planungsprozessen berücksichtigt werden, hängt aus Sicht von Schlosberg (2004) stark mit Fragen der Anerkennung zusammen. Aufbauend auf den Arbeiten von Iris Young und Nancy Fraser führt er an, dass die Nicht-Anerkennung von sozialen Gruppen und Individuen durch verschiedene Formen der Erniedrigung, der Einschüchterung und der Unterdrückung letztlich eine wesentliche Ursache von Verteilungsungerechtigkeiten ist. Fraser (2000: 113) folgend kann fehlende Anerkennung, z.B. durch staatliche Institutionen, als eine institutionalisierte Form der Unterdrückung angesehen werden. Relevant im Kontext der Fallstudien des Sammelbandes sind hier insbesondere die folgenden Fragen: Welche Formen von Wissen werden in Planungsprozessen berücksichtigt? Welches Wissen und von welchen Akteur:innen gilt als bedeutsam? Welche Akteur:innen werden als glaubwürdig bzw. weniger glaubwürdig eingestuft?

Insbesondere im Kontext von Umweltkonflikten sind diese Fragen häufig zentral. Umweltwissen gilt Goldman und Turner (2011) folgend als besonders umkämpft und unsicher. So verweisen die beiden Wissenschaftler:innen darauf, dass Umweltwissen von einer Vielzahl von Akteur:innen produziert wird. Dies umfasst sowohl Wissenschaftler:innen, Planner:innen, Ressourcen nutzende Gruppen als auch Laien. Deren Ansichten und Erklärungen über (vermeintlich) kausale Zusammenhänge zwischen Interventionen und Umweltwirkungen (z.B. über die Bedenklichkeit oder Unbedenklichkeit des ausgebaggerten Schlicks aus der Elbe) werden auch durch Wertvorstellungen und Interessen der Akteur:innen beeinflusst (Hein/Thomsen 2023). Ob und inwiefern sich bestimmte Erklärungen durchsetzen, basiert laut Goldman und Turner (2011) folglich nicht notwendigerweise auf der Qualität der wissenschaftlichen Untersuchungen, sondern wird auch durch gesellschaftliche Machtverhältnisse beeinflusst. Die Produktion von Wissen über Umweltbelastungen und deren Ursachen ist demnach weder neutral noch objektiv. Miranda Fricker (2016) verdeutlicht in ihren Arbeiten zur epistemischen Ungerechtigkeit, dass Glaubwürdigkeitsbewertungen meist auf Basis von individuellen Erfahrungen, Annahmen, Werten und Interessen getroffen werden. Dies kann bspw. dazu führen, dass die Beobachtungen von Laien, Menschen ohne formalen Schulabschluss oder bestimmter ethnischer Gruppen als weniger glaubwürdig, nachrangig oder gar irrelevant eingestuft werden (Fricker 2016; Klepp/Fünfgeld 2022; Mendes Barbosa/Walker 2020).

Alle drei Dimensionen der Umwelt(un)gerechtigkeit sind letztlich in die bestehende politische Ökonomie, in Machtasymmetrien und strukturelle Ungleichheiten eingebettet und werden durch diese mitverursacht (Faber 2017). Insbesondere der Staat und seine Rolle wirkt in der bisherigen Umweltgerechtigkeitsforschung jedoch häufig unterkonzeptualisiert (Purucker 2021). Hier können die staatstheoretischen Überlegungen von Nicos Poulantzas (1978) interessante Ansätze liefern. Poulantzas sieht den Staat nicht als einen monolithischen Block an, sondern als ein soziales Verhältnis, das in Form von Apparaten (z.B. Behörden, Ministerien, Polizei) eine Materialität schafft, die in sich selbst durch Auseinandersetzungen und Widersprüche geprägt ist (Brand/Görg 2003). Machtverhältnisse und Kämpfe zwischen Klassen und sozialen Gruppen schreiben sich dabei in die materielle und institutionelle Struktur des Staates ein (Brad/Hein 2019; Brad/Hein 2022; Brand/Görg 2003) und beeinflussen die strategische Selektivität des Staates und seiner verschiedenen Apparate (Jessop 1999). Mit dem Begriff der strategischen Selektivität beschreibt Jessop (1999), dass bspw. bestimmte Ministerien

oder Behörden die Interessen bestimmter Akteur:innen stärker berücksichtigen und die Interessen anderer ignorieren. Die strategische Selektivität des Staates beeinflusst daher, welche Akteur:innen Zugang zu Prozessen der Politikformulierung haben und wer und welche Gruppen somit auch über Gesetze und Planungsvorgaben entscheiden (Brad/Hein 2019; Brad/Hein 2022; Brand/Görg 2003). Eine staats-theoretische Perspektive ermöglicht es somit, die Ursachen von als ungerecht empfundenen Planungsprozessen herauszuarbeiten. Beispielsweise verdeutlichen Hilder und Hein (dieser Band: 207-233) anhand der Auseinandersetzungen um eine mögliche Erweiterung des Hafens in Hamburg-Moorburg, dass die Interessen der Hafenindustrie stärker in die Struktur des Staates und seiner Institutionen eingeschrieben sind, als die der Landwirt:innen in den ehemaligen Marschdörfern des Süderelbe Raums. Als ungerecht und intransparent empfundene Planungs-, Entscheidungs- und Beteiligungsprozesse, bspw. die Zerstörung des Dorfs Altenwerder für das gleichnamige Container-Terminal und spezifische Regeln wie die vorgeschriebene Duldung von Umweltbelastungen im Hafengebiet, sind Folgen dieser gesellschaftlichen Machtasymmetrien.

## Transformation und (Umwelt-)Gerechtigkeit

Transformation ist in den meisten Fällen ein Prozess, der Gewinner und Verlierer erzeugt. Dieser Prozess wird häufig von gesellschaftlichen Auseinandersetzungen begleitet und führt zur Neuaushandlung und Neukonfiguration von Umweltgerechtigkeitsfragen (Pohle et al. 2021). Im deutschsprachigen Raum befindet sich die Forschung zu den Umweltgerechtigkeitsimplikationen von Transformationsprozessen noch in den Anfängen. Gerechtigkeitsfragen spielen in der sozialwissenschaftlichen Umweltforschung aber schon lange eine Rolle. Hier sind insbesondere Arbeiten, die sich mit dem Ziel der nachhaltigen Entwicklung und der politischen Umsetzung dieser Ziele, z.B. dem *Agenda 21* Prozess, beschäftigen, von Bedeutung (siehe z.B. Elkins 2007; Fiedler 1998; Hein 1998). Zudem sind hier die bereits eingangs erwähnten Arbeiten zur sozialökologischen Transformation relevant: Bauriedl, Held und Kropp (2021) zu Folge impliziert der Begriff der sozialökologischen Transformation von vorne herein Gerechtigkeitsfragen: »die soziale und die ökologische Dimension [können] weder getrennt noch rein additiv betrachtet werden, sondern [müssen] in ihren Verflechtungen und Zielkonflikten gesehen werden« (Bauriedl/Held/Kropp 2021: 25).

Gerechtigkeitsfragen ergeben sich dabei nicht nur generationenübergreifend und intersektional, sondern auch räumlich. So weisen viele Arbeiten (siehe z.B. Bauriedl/Held/Kropp 2021; Brad/Hein 2022; Merten et al. 2021) auf Landnutzungskonflikte im ›globalen Süden‹ als Folge von Klimapolitiken in wohlhabenden Ländern hin. Flächenkonkurrenzen, auch in Europa, bspw. zwischen Nahrungsmittelproduktion, Bioökonomie, Klimaschutz und dem Schutz der Artenvielfalt, illustrieren Zielkonflikte auf besonders eindrückliche Weise (Pohle et al. 2021). Sie verdeutlichen, dass Landressourcen begrenzt und vermeintliche *win-win* Lösungen in den meisten Fällen schwer umsetzbar sind. Flächenkonkurrenzen sind folglich unmittelbar mit Gerechtigkeitsfragen verknüpft: Welche Akteur:innen profitieren vom Status quo der Landnutzung? Wer verdient an der Ausweitung der Biogas- oder Agrartreibstoffproduktion? Wer sind die Verlierer:innen des Wandels? Wie können staatliche Akteur:innen in Zielkonflikten vermitteln? Hier wird von einigen Autor:innen auf die Relevanz von Planungsinstrumenten, z.B. der Raumordnung und Flächennutzungsplanung, verwiesen (Hofmeister/Warner 2021; Pohle et al. 2021; Schulz/Warner 2021). Diese sollte sich, so Warner und Kolleg:innen (2021: 221), vor allem am Gemeinwohl ausrichten, Externalisierungen vermeiden und »die intra- und intergenerationale Gerechtigkeit als Wertmaßstab« nutzen.

In der englischsprachigen Diskussion wurden Transformation und Umweltgerechtigkeit auch begrifflich schon länger zusammen gedacht. Hier sind insbesondere die Konzepte *just transition* (Stevis/Felli 2015; Swilling/Annecke 2012) und *just sustainabilities* (Agyeman/Evans 2004), die zunehmend auch im deutschsprachigen Raum an Einfluss gewinnen, zu nennen. Insbesondere in Großbritannien begann die Umweltgerechtigkeitsbewegung sich Ende der 1990er Jahre verstärkt mit dem zunehmend dominant werdenden Konzept der nachhaltigen Entwicklung zu beschäftigen und damit stärker die gesellschaftlichen Ursachen von Umweltverschmutzungen in den Blick zu nehmen (Agyeman/Evans 2004). Das Konzept und die politische Forderung nach einer *just transition* hat dagegen seine Ursprünge in der nordamerikanischen Gewerkschaftsbewegung und wandelte sich in den letzten 15 Jahren zum dominanten umweltpolitischen Programm der Gewerkschaften auf globaler Ebene (Stevis/Felli 2015). Im Vordergrund steht dabei im weitesten Sinne die Forderung, Umweltpolitiken möglichst arbeitnehmer:innenfreundlich bzw. sozial gerecht zu gestalten. Das Konzept wird dabei von verschiedenen Gewerkschaften durchaus unterschiedlich interpretiert. Der *Internationale Gewerkschaftsbund* setzt auf ökologische Modernisierung, »green jobs« (Stevis/Felli 2015: 36) und Sozialversicherungssysteme, um mögliche Auswirkungen



von Arbeitsplatzverlusten abzufedern und stellt dabei Machtverhältnisse und politische Ökonomie nicht grundlegend in Frage. In dieser Lesart wird *just transition* auch zunehmend in der internationalen Zusammenarbeit zum zentralen Leitbild. So sieht die amtierende Bundesministerin für wirtschaftliche Zusammenarbeit und Entwicklung »*just transition* als Teil einer global gestaltenden Strukturpolitik an« (Schulze 2022: o.S.). Es lassen sich durchaus auch radikalere Interpretationen des Begriffs durch einige Gewerkschaften finden. So wird in Publikationen des *European Trade Union Institute* (ETUI), dem *think tank* der Gewerkschaften in der EU, bspw. grünes Wachstum grundsätzlich in Frage gestellt und stattdessen auf demokratische Formen der Wirtschaftsplanung verwiesen (siehe z.B. Coutrot/Gadrey 2012).

In jüngerer Zeit findet das Konzept zunehmend Eingang in die Forschung und wird auch hier unterschiedlich interpretiert. Während bspw. Swilling und Annecke (2012) die sozio-technische Transitionsforschung mit Gerechtigkeitskonzepten verbinden, um die Möglichkeiten einer gerechten Transformation in Südafrika auszuloten, analysieren andere die Ursachen für die Popularität des Konzepts oder beschäftigen sich mit seiner Genealogie (Morena/Krause/Stevis 2020a). Das *Just Transition Research Collaborative* (JTRC) (UNRISD 2020), das sich auch mit der deutschen Energiewende und dem Kohleausstieg auseinandersetzt (siehe z.B. Krause et al. 2022; Morena/Krause/Stevis 2020b), schlägt einen Analyserahmen zur Bewertung von *just transition*-Politiken und Forderungen vor. Dieser versucht Gerechtigkeitsfragen auf verschiedenen räumlichen Ebenen und in unterschiedlichen Dimensionen zu fassen, bspw. im Kontext lokaler Proteste für die Schließung eines Tagebaus, einem möglichen weltweiten Kohleausstieg oder dem Ausstieg aus allen fossilen Energiequellen. Sie schlagen vor, auch die Wechselbeziehungen zwischen Orten, Räumen und Politiken in den Blick zu nehmen. Es gilt zwischen Politiken zu unterscheiden, die auf lokaler Ebene einen gerechten Wandel ermöglichen, aber die globalen Ungleichheiten verstärken (und umgekehrt) und solchen, die sowohl auf lokaler, regional als auch auf globaler Ebene als gerecht bewertet werden können (Stevis/Felli 2020). Während die Arbeiten des JTRCs insbesondere auf die Bedeutung der Gewerkschaftsbewegungen für eine gerechte und grüne Transition verweisen (Krause et al. 2022; Morena/Krause/Stevis 2020b; Stevis/Felli 2015, 2020), zeigt Kalt (2022) auf Grundlage komparativer Fallstudien zu Südafrika und Deutschland, dass Gewerkschaften sich vor allem aus strategischen Gründen mit Ideen einer *just transition* auseinandersetzen. Kalt (2022 und dieser Band: 65-88) verweist auf eine starke Korrelation zwischen

den sektorspezifischen Interessen einzelner Gewerkschaften und deren Haltung gegenüber Versuchen, die Elektrizitätsproduktion zu dekarbonisieren.

Insgesamt lässt sich sagen, dass Perspektiven der Umweltgerechtigkeit auf vielfältige Weise wertvolle Beiträge zur einer strukturell angelegten sozialökologischen Transformation und zur entsprechenden Forschung leisten können. Sie eignen sich besonders gut, um strukturelle Ungerechtigkeiten zu erkennen und auf unterschiedlichen Ebenen (*scales*) zu hinterfragen. Auch subtilere Anerkennungsfragen, die ontologische und epistemologische Aspekte und Hegemonien einschließen und oft unsichtbar bleiben oder naturalisiert werden, sind mit einem Verständnis für Umweltgerechtigkeit greifbarer. Da seit den Anfängen die Ideen und geistigen Führer:innen der Umweltgerechtigkeitsbewegung gerade nicht nur in westlichen Ontologien und Epistemologien verhaftet sind, kann es hier auch wertvolle Anregungen für Mensch-Umwelt-Beziehungen geben, die bspw. weniger ressourcenintensives Wirtschaften oder ein anderes Wohlstandskonzept beinhalten, wie etwa der in Südamerika entwickelte *buen vivir*-Ansatz. Damit können »imperiale Lebensstile« (Brand/Wissen 2012) in Zeiten der sozialökologischen Krise hinterfragt und neu verhandelt werden. Die Fallbeispiele des Sammelbandes verdeutlichen dabei den dringenden Bedarf an lokal geführten oder orientierten Klimapolitiken, die fair und offen für unterschiedliche Einflüsse und für »ontologischen Pluralismus« (Nightingale 2020: 343) sind. Umweltgerechtigkeit kann zu diesen Politiken beitragen und soziales und kreatives Potenzial für einen radikalen Systemwandel freisetzen, um so die sozioökologische Krise und deren Ursachen zu bekämpfen und Transformation herbeizuführen.

## Unterschiedliche Vorstellungen von Nachhaltigkeit

Die Spannungen und unterschiedlichen Einschätzungen zu Tiefe und Ausmaß der sozialökologischen Krise und den angemessenen Antworten darauf zeigen sich auch in der großen Bandbreite, wie sozialökologische Transformation derzeit im deutschsprachigen Raum diskutiert wird. Die diskursiven Rahmungen der Debatten um sozialökologische Transformation erinnern dabei teilweise an Argumente, die schon aus Debatten über Nachhaltigkeit seit den 1970er Jahren bekannt sind (Bruns/Braun 2021). So schließen der dominante Diskurs und darauf aufbauende Politiken an Vorstellungen der ökologischen Modernisierung an, die vor allem auf technische Innovation als Antwort auf die sozialökologische Krise setzen. In einem weitreichenderen

Transformationsansatz werden hingegen strukturelle gesellschaftliche Veränderungen und soziale Innovationen gefordert. Diese Ansätze, wie bspw. die Postwachstumsdebatte (Lange et al. 2020), fordern eine Abkehr von der ökonomischen Wachstumslogik und einen tiefgreifenden Kulturwandel in den Mensch-Umwelt-Beziehungen, der sich auch in eher relational angelegten Forschungskonzepten spiegeln sollte (Gesing 2022). Hier werden zunehmend auch unsere durch die kapitalistische Wirtschaftsordnung geprägten sozialen Beziehungen und Werteordnungen hinterfragt (Rosa 2016; von Redecker 2020).

Das hier aufgezeigte Spannungsfeld zwischen ökologischer Modernisierung und strukturellem Wandel hängt eng mit unterschiedlichen Vorstellungen von Entwicklung und Fortschritt zusammen (Hein/Thomsen 2023). Dies ist einer der Gründe warum die Transformationsdebatte oft sehr emotional geführt wird (Baasch, dieser Band: 45-64) und die Fronten verhärtet erscheinen (Fladvad/Hasenfratz 2020). Emotionale Aspekte und unsere Vorstellungen von Entwicklung und guter Zukunft spiegeln sich in Politiken der Nachhaltigkeit und ganz allgemein in der Gestaltung unserer Mensch-Umwelt-Beziehungen (Fladvad/Hasenfratz 2020; Hinchliffe 2007) wider. Was bedeutet ein gutes Leben für uns und kommende Generationen? Sind ein Einfamilienhaus und ein Auto weiterhin die dafür notwendigen Statussymbole (Dünckmann et al. 2022)? Ist es heute noch anstrebenswert und moralisch vertretbar einen SUV zu fahren? Sollte es hingegen ein E-SUV sein? Oder sind heute nur kollektive Mobilitätsangebote des öffentlichen Nahverkehrs angemessen?

Entwicklungsnarrative und Vorstellungen vom guten Leben sind dabei abhängig von unterschiedlichen Faktoren (Nightingale et al. 2019): von sozialer und kultureller Prägung, vom Land oder der Region, in der wir leben, davon, ob unser Umfeld eher städtisch oder ländlich geprägt ist und ob wir eher zu den ärmeren oder reicheren Bevölkerungsteilen gehören. Heutige Narrative von Entwicklung unterscheiden sich, wobei Entwicklung als Wachstum der Wirtschaft immer noch die vorherrschende Vorstellung von Entwicklung bleibt, gefolgt von Entwicklung als grüne Modernisierung (Fladvad/Hasenfratz 2020). Dies schließt auch die Vorstellung ein, dass durch technologischen Fortschritt ein stetes ökonomisches Wachstum weiter beibehalten werden kann, das ökologisch verträglich ist. Die Wissenschaft, aber auch z.B. der Bericht des *Entwicklungsprogramms der Vereinten Nationen* von 2020 weisen dabei darauf hin, dass diese Vorstellung bisher nicht realisiert werden konnte bzw. in ihrer Umsetzbarkeit widerlegt ist (UNDP 2020). Dies hängt vor allem mit dem sogenannten *rebound*-Effekt zusammen: Autos sind größer geworden, unser Kon-

sum wie auch unser Ressourcenverbrauch sind immer weiter gestiegen und haben den technologischen Fortschritt und Einsparungen durch effizientere Technologien zunichte gemacht (Greening/Greene/Difiglio 2000). Auch Sommer und Welzer formulieren als Ausgangspunkt für die Analyse unserer heutigen Lage, dass heute »keine Gesellschaft [existiere], die sich als modern charakterisieren ließe und deren Stoffwechsel mit der Natur auch nur annähernd auf einem ökologisch nachhaltigen Niveau zu verorten wäre« (Sommer/Welzer 2014: 65). Noch deutlicher argumentieren Protagonist:innen der Postwachstumsbewegung, mit Verweis auf das aus den Naturwissenschaften stammende Konzept der Entropie und auf die Arbeiten des Ökonomen Georgescu-Roegen (1971). Sie gehen davon aus, dass permanentes Wachstum trotz fortlaufender Innovationen und effizienterer Formen der Ressourcennutzung physikalisch nicht möglich sei (Ulgiati 2015). Diese Einsichten sind zentral, da das Narrativ des grünen Wachstums immer noch die gesellschaftliche Debatte und vor allem die Politik bestimmt (Sommer/Welzer 2014).

Die Postwachstumsbewegung und weitere Bewegungen haben heute auch Vorstellungen von Entwicklung etabliert, die explizit gegen Wachstum als vornehmliches Entwicklungsziel argumentieren (Lange et al. 2020). Hier wird ausbuchstabiert, wie Lebensstile und die Vorstellung, was ein gutes Leben auch bedeuten kann, welches nicht von ökonomischem Wachstum abhängt, aussehen können. Diese Vorstellungen schließen dabei bspw. an das *buen vivir*-Konzept aus Südamerika an, das auf einem relationalen Verständnis von Menschen und ihrer Umwelt beruht (Cubillo-Guevara et al. 2018). Dies bedeutet ein Verständnis, das Natur und Kultur nicht trennt, sondern die gegenseitige Abhängigkeit und Beziehungen aufzeigt. Zur Förderung solcher Ansätze kann Umweltgerechtigkeit beitragen, da sie bezüglich unterschiedlicher Wissensquellen und Weltansichten auf Mensch-Umweltbeziehungen einen inklusiven Anspruch vertritt.

An den Rändern der Debatte um sozialökologische Krisen und multiple Ungleichheitsverhältnisse im deutschsprachigen Raum lassen sich allerdings auch Verbindungen zu rechtspopulistischen und misogynen Diskursen analysieren. Hultman und Pulé (2019) untersuchen, wie Klimaschutzpolitiken und sozialökologische Transformation zu mehr Klimaskeptizismus führen können, da »*industrial/breadwinner masculinities*« und anschließende Lebensstile grundsätzlich in Frage gestellt würden. Diese Aushandlungsprozesse machen deutlich, dass im Kontext der sozialökologischen Transformation auch intersektionale Diskriminierung verhandelt wird (Bührmann/Dobusch/Weller 2021), was im Kontext von Klima- und Transformationspolitiken im

›globalen Norden‹ jedoch noch kaum berücksichtigt wird. Röhr und Weller (2021) weisen darauf hin, dass die geschlechtergerechte Gestaltung der Klimapolitiken kaum eine Rolle spiele, obwohl die Brisanz für Gender- und Diversitätsperspektiven bei Maßnahmen etwa zur Förderung der Elektromobilität, zum Ausbau der erneuerbaren Energien und zur Energieeffizienz in Gebäuden vom deutschen *Umweltbundesamt* (UBA) und *Bundesministerium für Umwelt, Naturschutz und nukleare Sicherheit* (BMU) anerkannt wird. Entsprechend dem deutschen Klimaschutzgesetz und dem *Klimaschutzprogramm 2030* werde der Klimaschutz jedoch vor allem sektoral nach den Handlungsfeldern Verkehr, Energie, Bauen und Wohnen und Landwirtschaft gegliedert. Die Verantwortung zur Umsetzung liegt in den entsprechenden Ministerien, die bisher mit einer großen Nähe zu Industrie und Lobbyverbänden einen starken Fokus auf technische Innovation gelegt hätten und wenig Bereitschaft zur Berücksichtigung von Gender und Diversität in den Klimapolitiken zeigten (Röhr/Weller 2021). Auch Fisch, Frost und Dietl (dieser Band: 177-206) arbeiten heraus, dass Genderaspekte in Klimapolitiken bisher auf lokaler Ebene nur sehr selten aufgegriffen würden und dann in erster Linie Frauen als binär gedachte Kategorie adressierten, die als besonders vulnerabel gilt.

Auch aufgrund dieser großen Diskrepanz zwischen wissenschaftlich verbriefter Notwendigkeit einer tiefgreifenden sozialökologischen Transformation und den bisher nur sehr zögerlichen und technologiezentrierten Veränderungen möchte unser Buch zu Debatten anregen, die bislang noch kaum geführt werden. Besonders deutlich wird diese »laute Stille« in der Diskussion um luxuriöse, sehr energie- und ressourcenintensive Lebensstile (Mießner/Naumann, dieser Band: 259-277). Während Verzicht aufgrund von steigenden Preisen vor allem ärmere Bevölkerungsschichten trifft, die ohnehin einen geringeren ökologischen Fußabdruck haben, werden die hohen Schäden und Gemeinschaftskosten, die sehr wohlhabende Bevölkerungsschichten verursachen, kaum debattiert oder von der Politik adressiert. Aktuelle Studien belegen dabei, dass bspw. die Zahl an Privatjetflügen in Deutschland in den letzten Jahren stark zugenommen hat (Baars 2023). 60 % der geflogenen Strecken sind dabei kürzer als 300 Kilometer (Baars 2023). Während es in Frankreich intensive Debatten über eine Einschränkung von Privatjet-Flügen gibt, ist es in Deutschland nicht einmal möglich, Daten zu den verursachten Treibhausgasen zu erheben, da die entsprechenden Informationen den Ministerien nicht vorliegen (Baars 2023). Auch in der oberen Mittelschicht etablieren sich Lebensstile, die sehr emissions- und flächenintensiv sind, wie das Kapitel von Mießner und Naumann zeigt (dieser Band: 259-277). Ferienwohnungen in den

Alpen, aber bspw. auch an den Küsten im deutschen Nord- und Ostseeraum, werden immer beliebter. Sie stehen zumeist leer oder werden als Kapitalanlagen an Feriengäste vermietet. Die davon betroffenen Orte und Dorfgemeinschaften haben immer weniger Bewohner:innen und es wird für Einheimische oder Menschen, die vor Ort arbeiten, immer schwieriger und teurer, hier zu wohnen. Andererseits gibt es Suffizienz- und Verzichtsbewegungen, die, wie oben genannt, aus Überzeugung und freiwillig emissionsintensive Lebensstile meiden.

Diese Entwicklungen und Debatten zeigen, wie unsichtbar große Fragen der Umweltgerechtigkeit vor dem Hintergrund der sozialökologischen Transformation immer noch sind oder gemacht werden. Dies liegt einerseits daran, dass wir kapitalistisches Denken und Handeln internalisiert haben: »It seems easier to imagine the end of the world than a far more modest change in the mode of production, as if liberal capitalism is the ›real‹ that will somehow survive even under conditions of a global ecological catastrophe.« (Žižek 2012: 55) Die »Gleichursprünglichkeit« (Biesecker/Hofmeister 2013: 241) der ökologischen *und* sozialen Krise wird nicht thematisiert, eine systemische Veränderung erscheint so undenkbar. Hingegen werden Begriffe wie *Nachhaltigkeit*, *nachhaltige Entwicklung* und nun auch *Transformation* immer wieder neu interpretiert und in marktgerechte Denk- und Handlungsweisen eingebettet (Bauriedl/Wissen 2002). Andererseits treten zwischen dem Willen zur sozialökologischen Transformation, sei sie systemisch oder ökologisch-modernisierend angelegt, und den Bedingungen unserer derzeitigen Lebens- und Wirtschaftsweisen und unseres politischen Systems auch handfeste Ziel- und Systemkonflikte auf. Es gibt Spannungen, die komplex und schwierig aufzulösen sind, wie die Fallstudien dieses Sammelbandes zeigen.

## **Zielkonflikte, Spannungen und Akteur:innen der sozialökologischen Transformation**

Mit Blick auf die Zielkonflikte, die unsere Fallstudien illustrieren, wird deutlich, dass auch im ›globalen Norden‹ Fragen der Zugänglichkeit von Räumen und des Eigentums, also Raum- und Eigentumsverhältnisse, im Zentrum unserer Debatten stehen müssen. Christiane Bunge verdeutlicht bspw. in ihrem Beitrag mit Verweis auf den *European Urban Atlas* (EUA), dass der Zugang zu städtischen Grünflächen in Deutschland stark mit dem Einkommen zusammenhängt (Bunge, dieser Band: 279–306). So verfügen die wohlhabends-

ten Bevölkerungsgruppen über deutlich mehr Grünflächen in ihrer direkten Umgebung als die ärmsten Bevölkerungsgruppen. Zudem sind innerstädtische Flächen durch Klima- und Naturschutz-Aufgaben und zunehmend auch durch Maßnahmen zur Klimawandelanpassung mehr und mehr umkämpft. Der Beitrag von Wirtz, Cavallo und Schmidt illustriert, dass die Erreichung von klimapolitischen Zielen durch die Einrichtung von mehr Grünflächen in Innenstädten und die gleichzeitig sozial notwendige Schaffung von Wohnraum eine immense Herausforderung für die Kommunalpolitik bedeuten (Wirtz/Cavallo/Schmidt, dieser Band: 235-257). Die Kämpfe um Kleingärten und innerstädtisches Grün, die von den Autor:innen aufgegriffen werden, zeigen auch, dass exklusiver Zugang und Nutzungsrechte in der Innenstadt im Fall der Kleingärten zunehmend umstritten sein können, weil andere das kostbarer werdende ›Gut Grünflächen‹ als *commons* nutzen möchten. Dabei ist schon heute belegt, dass Menschen und auch Kinder und Jugendliche mit niedrigem Einkommen in Städten mit mehr als 20.000 Einwohner:innen zu Fuß länger von zu Hause zu einer öffentlichen Grünfläche brauchen als Kinder und Jugendliche aus einkommensstarken Familien (Bunge, dieser Band: 279-306 nach Rehling et al. 2021).

Gerade in den Fragen um exklusive Nutzungsrechte scheint dabei Bewegung in die Debatten gekommen zu sein und neue Akteur:innen treten auf. Kleingärten können auch gemeinschaftlich gepflegt werden und Dorndorf zeigt in ihrem Kapitel zur Einrichtung von Moorschutzflächen, dass auch bei Fragen zum Verkauf oder zur Bereitstellung von Eigentum immer öfter Natur- und Klimaschutzaspekte berücksichtigt werden müssen. Die Eigentümer:innen, die ihre ungenutzten Flächen auch nach Jahren nicht für das Moorschutzprojekt zur Verfügung stellen, gelten als Blockierer:innen (Dorndorf, dieser Band: 145-175).

Das Kapitel von Dorndorf zu den unterschiedlichen Zeitlichkeiten von Moorschutzmaßnahmen und *nature-based solutions* weist auch auf das grundsätzliche Problem hin, dass Prozesse wie Flurbereinigungsverfahren oder auch die Vernässung eines Moores und damit die wirkungsvolle Bindung von Emissionen sehr lange dauern. Dorndorf schildert dabei eindrücklich die Temporalitäten der erforderlichen Prozesse für die Umsetzung von *nature-based solutions* zum Klimaschutz. Diese umfassen zum einen bürokratische Verfahrensstrukturen, die von politischen Zeitstrukturen zur Willensbildung, wie Wahlzyklen, überlagert sind. Auch das Projekt selbst beruht auf einer (eher kurzen) Zeitlichkeit, der Projektlaufzeit. Auf der Ebene von Individuen fordern zudem einzelne Flurstückbesitzer:innen Zeit für ein aus ihrer Sicht

gerechtes Beteiligungsverfahren ein, welches jedoch von anderen Beteiligten, auch anderen Flurbesitzer:innen, als Blockade wahrgenommen wird. Die aufgezeigten natürlichen, gesellschaftlichen und individuellen Temporalitäten stehen dabei teilweise im Widerspruch zueinander (Dorndorf, dieser Band: 145-175). Zudem sind sie gegenläufig zur Eile, die aufgrund der multiplen ökologischen Krisen (Rockström 2009) beim Klimaschutz geboten wäre. Demokratische Abläufe und Beteiligung, aber auch die Einrichtung von wirkungsvollen Klimaschutzverfahren, die nicht vor allem auf technische Entwicklungen zurückgreifen, brauchen also Zeit, die uns im Klimaschutz fehlt. Dennoch erscheint uns gerade in Zeiten eines Angriffskrieges in Europa und der Erstarkung autokratischer Regierungsformen kaum etwas mehr schützenswert als demokratische, rechtssichere Prozesse.

Anschließend an die hier genannten langwierigen bürokratischen Prozesse machen auch verschiedene weitere Fallstudien des Sammelbandes deutlich, dass die Einführung neuer politischer Prioritäten wie sozial verträglicher Klimaschutz an der in Deutschland fest verankerten Sektorenpolitik scheitert. Für die Umsetzung umweltpolitischer Maßnahmen in Ministerien und Verwaltung und ein *mainstreaming*, wie es das deutsche Bundes-Klimaschutzgesetz vorsieht, wie auch für die Berücksichtigung von Gerechtigkeits- und Diskriminierungsfragen bei der Umsetzung dieser Maßnahmen ist das in unterschiedlichen Ressorts verhaftete Denken, die sich oftmals in Konkurrenz zueinander sehen, eine Hürde. Wie das Kapitel von Bunge zeigt, sind zunächst viel Einzelengagement sowie schlagkräftige Organisationen nötig, um das Thema Umweltgerechtigkeit auf verschiedenen Ebenen zu stärken und zu verankern (Bunge, dieser Band: 279-306). Auch der Beitrag von Fisch, Frost und Dietl zu Klimawandelanpassungspolitiken und Genderdimensionen in Duisburg macht deutlich, dass es oft einzelne Akteur:innen sind, die in starke Netzwerke eingebettet sind, die beim Thema Gender und Diversität in der kommunalen Klimapolitik voranschreiten, um soziale Gerechtigkeit zu verankern (Fisch/Frost/Dietl, dieser Band: 177-206). Neben Kompetenzgerangel und der Nähe zur Industrie der deutschen Ministerien (Röhr/Weller 2021) sind es außerdem auch die oft sehr einschränkenden projektbasierten Maßnahmen, die neoliberalen Logiken folgen (Fisch/Frost/Dietl, dieser Band: 177-206), die einen strukturellen Wandel schwierig machen. Demgegenüber zeigen Fisch, Frost und Dietl wie sinnvoll es sein kann, vorbereitende Studien für entsprechende Projekte nicht an die oftmals berücksichtigten Akteur:innen im *consulting*-Bereich zu vergeben, sondern bspw. mit universitären Studien



den Projekten herrschaftskritischere und holistischere Ansätze zu Grunde zu legen (Fisch/Frost/Dietl, dieser Band: 177-206).

Mit einem Blick auf die vielfältigen Akteur:innen und Akteurskonstellationen, die in den Fallstudien sichtbar werden, sind u.a. Beteiligungsprozesse und die teilweise überraschenden Allianzen, die sich in Kämpfen um Umweltgerechtigkeit formieren, interessant. Es zeigt sich immer wieder, wie zeit- und ressourcenintensiv (zivilgesellschaftliche) Beteiligung ist. Die häufig umkämpfte Ausgestaltung von Beteiligungsverfahren kann sowohl inkludierend wirken und so prozedurale Gerechtigkeit ermöglichen als auch exkludierend wirken (Baasch, dieser Band: 45-64). Insbesondere der Beitrag von Hilder und Hein über Konflikte um eine mögliche Hafenerweiterung in Hamburg-Moorburg zeigt, wie das Hamburger Hafenerweiterungsgesetz prozedurale Ungerechtigkeiten schafft, die auch durch Beteiligungsformate wie dem ständigen Gesprächskreis Moorburg nicht aufgelöst werden können (Hilder/Hein, dieser Band: 207-233). Diese, so die Autoren, ermöglichten lediglich die Probleme des Stadtteils mit Behörden zu diskutieren. Es besteht jedoch nicht die Möglichkeit Planungsprozesse zu beeinflussen.

Sowohl im zivilgesellschaftlichen Engagement wie auch im Kontext der Energiegenossenschaften (Rieder et al., dieser Band: 117-143) sind es oftmals gut situierte, »ältere, weiße Männer«, die sich in Planungsprozessen engagieren. Sie verfügen über das Wissen und das Kapital, um sich in zeitintensive, unbezahlte Aushandlungsprozesse einzubringen. Fehlende Diversität ist dabei auch ein Problem in jüngeren Gruppen, die sich klimapolitisch engagieren (de Moor et al. 2020).

Die Fallstudie von Beckmann und Heyer zu Umsiedlungen im Rheinland, die durch den Braunkohletagebau bedingt sind, zeigt, wie zentral Partizipationsprozesse auch für die Verhandlungen von Räumungen sind und wie groß die sich hier zeigenden Machtasymmetrien zwischen den Bewohner:innen und Protestierenden und der Landesregierung und RWE sind (Beckmann/Heyer, dieser Band: 89-116). Deren Informationspolitik wird immer wieder als verschleiern oder sogar als die Proteste absichtlich spaltend wahrgenommen. Beckmann und Heyer zeigen auf der Ebene der Akteurskonstellationen, dass die verschiedenen Protestgruppen unterschiedliche Interessen und Motivationen haben können. Während einige eher den lokalen Protest für den Erhalt der Dörfer in den Vordergrund stellen, ist für andere struktureller Wandel und globale Klimagerechtigkeit der Fokus des Anliegens. Hier entstehen temporär sehr heterogene Allianzen, die teilweise, wie sich auch in der Fallstudie zu den Frankfurter Kleingärten zeigt (Wirtz/Cavallo/Schmidt, dieser

Band: 235-257), gerade aufgrund ihrer Heterogenität und der Nutzung unterschiedlicher Organisationsformen und Proteststrategien erfolgreicher sein können, als eine homogenere Gruppe von Aktivist:innen. Unterschiedliche politische Ziele und Transformationsansprüche stehen dabei nebeneinander. Auch hier treffen Vorstellungen von und Forderungen nach strukturellem Wandel und Postwachstumsökonomien auf Ansprüchen, die eher innerhalb von Logiken der ökologischen Modernisierung bleiben (Kalt, dieser Band: 65-88; Beckmann/Heyer, dieser Band: 89-116; Wirtz/Cavallo/Schmidt, dieser Band: 235-257).

Auch weitere neue Allianzen lassen sich in den Debatten um Kohleausstieg, Klimaschutz und regionale Entwicklungsvisionen beobachten. Nachdem die Gewerkschaften aus Interessen des Arbeitsplatzschutzes im Kontext des Kohleausstiegs lange eher gebremst haben und Umweltverbände sich wenig für die soziale Abfederung des Ausstiegs interessierten, ist im Rahmen der Verhandlungen der Kohlekommission Bewegung in die Konfliktlinien gekommen (Kalt, dieser Band: 65-88). Nicht mehr *Arbeit vs. Klima*, sondern *Arbeit und Klima vs. Kapital* scheint nun eine neue Strategie zu sein, die immer mehr auch gemeinsam und von den Gewerkschaften verfolgt wird (Kalt, dieser Band: 65-88). Die oben aufgezeigte Diskussion um *just transition* und die Kapitel von Beckmann und Heyer (dieser Band: 89-116) und Kalt (dieser Band: 65-88) zeigen dabei wie Debatten um Braunkohletagebau als zentral für die Entwicklung der Region und für (männlich konnotierte) Arbeit durch das Thema Klimaschutz neu konfiguriert werden. Auch die Kämpfe um die Räumung von Lützerath zeigen eindrücklich, dass auch die Berichterstattung in der Tagespresse und der öffentliche Diskurs sich in Richtung einer Priorisierung des Klimaschutzes verschieben. Die Beiträge unserer Autor:innen zeigen jedoch auch, wie mächtig großindustrielle Akteur:innen nach wie vor sind, auch im Umgang mit den Landesregierungen und der Bundesregierung.

Bei einigen Akteur:innen und Debatten ist also auch auf der Ebene der Institutionen Bewegung erkennbar, wie die Bemühungen der Ministerien und Kommunen bei der Umsetzung von Klimaschutzmaßnahmen zeigen. Andere Debatten werden momentan noch kaum geführt: Welche Lebensstile sind heute gerecht und angemessen, auch mit Blick auf Generationengerechtigkeit? Welche Widersprüche tun sich auf, nicht nur bei offenkundig luxuriösen Lebensstilen, sondern auch bspw. bei gut situierten Bevölkerungsgruppen, die nach der ländlichen Idylle suchen, aber auch den Bau von Investitionsobjekten in Form von Ferienhäusern ankurbeln (Mießner/Naumann, dieser Band: 259-277)? Noch offene oder in der Öffentlichkeit noch kaum geführte Debatten

berühren also Fragen wie: Was bedeutet Luxus oder auch ein gutes Leben in Zeiten der sozialökologischen Krisen? Und wie werden kollektive und individuelle Freiheit und Verantwortung davon berührt?

## Zu den Beiträgen des Bandes

Neben Fragen zu stellen und – im besten Falle – Diskussionsanregungen zu liefern, sollte diese Einleitung auch eine Einführung in die Terminologien und in verschiedene Dimensionen der Umweltgerechtigkeit leisten, die in den folgenden Kapiteln wieder aufgegriffen werden und anhand von Fallstudien diskutiert und vertieft werden. Einige der Fallstudien gehen auf die Zusammenarbeit mit Stipendiat:innen der *Studienstiftung des Deutschen Volkes* zurück. Im Rahmen der Arbeitsgruppe *Umweltgerechtigkeit – die soziale und politische Dimension von Umweltkonflikten* des Gesellschaftswissenschaftlichen Kollegs VIII von 2019–2021, das von Jonas Hein und Silja Klepp geleitet wurde, sind empirische Studien zu Fragen der Umweltgerechtigkeit im deutschsprachigen Raum entstanden.

Nachdem wir einige Ergebnisse der Kapitel aufeinander bezogen und analytisch fruchtbar gemacht haben, möchten wir nun abschließend alle Beiträge kurz aufgreifen und ihre Hauptaussagen vorstellen.

Partizipationsverfahren sind in Zeiten der sozialökologischen Transformation in aller Munde. **Stefanie Baasch** leistet im ersten Kapitel des Bandes eine genauere Bestimmung der verschiedenen Gerechtigkeitsfragen und -dimensionen, die diese Prozesse ausmachen, auch bezüglich ihrer Implikationen, Folgen und Nebenfolgen. Abgesehen von dem eher unspezifisch-normativen Anspruch an Beteiligungsverfahren, gerecht zu sein, spielen differenziertere Betrachtungen von Gerechtigkeitskonzeptionen und -bewertungen in der Praxis kaum eine Rolle. Baasch zeigt auf, wie durch eine verengte Perspektive, die sich vor allem auf konkrete Planungsfragen oder auf die Umsetzung von Maßnahmen konzentriert, Konfliktpotenziale ausgeblendet werden, die auf unterschiedlichen Gerechtigkeitsvorstellungen beruhen. Sie zeigt, dass insbesondere Beteiligungsverfahren, die stark vordefiniert sind oder, wie im Fall der gezeigten Fallstudie zur Hamburger Olympiabewerbung 2024, als »Akzeptanzbeschaffung« interpretiert werden, eher zu einer Konfliktverschärfung führen können.

**Tobias Kalt** untersucht in seinem Beitrag Transformationskonflikte und verdeutlicht, dass die Dekarbonisierung kein rein technokratischer Prozess

ist, sondern ein Prozess der tiefgreifenden Gerechtigkeitsimplikationen aufweist. Anhand des Konflikts zwischen Gewerkschaften und Klimabewegungen im Kontext des Ausstiegs aus Kohleverstromung und dem Braunkohleabbau zeigt Kalt, dass Interessen, Ziele und die Gerechtigkeitsvorstellungen der Akteur:innen sich widersprechen und in Konflikt stehen. Kalt zeigt, dass der vermeintliche Gegensatz zwischen Arbeitsplätzen und der Reduktion von Treibhausgasen eine zentrale Konfliktlinie ist. Er verweist aber auch auf Konfliktverschiebungen und neue Allianzen zwischen einzelnen Gewerkschaften und Klimabewegungen.

**Lukas Beckmann und Helene Helix Heyer** beschäftigen sich in ihrem Beitrag mit braunkohlebedingten Umsiedlungen im Rheinland. Aufbauend auf Umweltgerechtigkeitskonzepten, dem Konzept der *energy sacrifice zones* (Lerner 2012) und Perspektiven der Politischen Ökologie untersuchen Beckmann und Heyer die gesellschaftlichen Aushandlungsprozesse um Enteignungen, Allgemeinwohl und dem »Loch«, wie die Braunkohletagebauflächen in der Region umgangssprachlich genannt werden. Sie verdeutlichen, wie Machtasymmetrien sowohl die Ausweitung der Tagebauflächen als auch die Verhandlungen um konkrete Umsiedlungen und Räumungen durchzogen haben. Sie verweisen auf die enge Verzahnung von Landesregierung und RWE und die dadurch verursachte Frustration der vom Tagebau Betroffenen. Beckmann und Heyer verdeutlichen auch, dass die verschiedenen Protestbewegungen keineswegs homogene politische Ziele aufweisen. Während einige Gruppen sich primär für den Erhalt ihrer Dörfer bzw. der Region einsetzen, verknüpfen anderen den Protest mit weitreichenden Forderungen nach Klimagerechtigkeit und sozial-ökologischer Transformation.

**Quirin Rieder, Konstantin Veit, Nikolaj Moretti, Luis Peters und Celine Li** rücken Fragen der Energiegerechtigkeit in den Vordergrund. Die Autor:innen beschäftigen sich mit Energiegenossenschaften (EG) in Baden-Württemberg und Berlin und analysieren dabei sowohl Forderungen der EGs nach einer gerechteren Energiewende als auch die Besitz- und Teilhabestrukturen der EGs. Sie zeigen, dass sich EGs als Gegenentwürfe zu zentralisierten Formen der Stromerzeugung durch Großkonzerne verstehen. Die EGs sehen sich als transformative Akteure an, die Bürger:innen eine aktive Teilhabe an der Energiewende ermöglichen und so eine demokratischere und gerechtere Transformation ermöglichen. Die Autor:innen merken jedoch kritisch an, dass EGs sich zwar nach innen um demokratische Entscheidungsprozesse bemühen, jedoch eine aktive und vollumfängliche Mitwirkung nur Anteilseigner:innen ermöglicht wird.

**Tabea Dorndorf** untersucht in ihrem Beitrag die Temporalitäten und Gerechtigkeitsimplikationen von natürlichen Klimalösungen (engl. *nature-based solutions*). Sie zeigt am Beispiel des seit über fünfzehn Jahren andauernden und umkämpfen Versuchs die Hannoversche Moorgeest wiederzuvernässen, dass die Umsetzung von vermeintlich »einfachen« Klimalösungen höchst komplex ist und daher keine schnelle und einfache Lösung zur Bekämpfung des Klimawandels darstellt. Dorndorf unterscheidet aufbauend auf Bopp und Bercht (2021) *natürliche*, *gesellschaftliche* und *micro* Zeitebenen und identifiziert so Widersprüche und Zielkonflikte. So geben Projektfinanzierungen bspw. häufig einen engen Zeitrahmen vor, der allerdings weder der Regenerationszeit der Moore entspricht noch den zeitlichen Erfordernissen von Planungs-, Flurbereinigungs- und Beteiligungsprozessen. Gleichzeitig verlangt der voranschreitende Klimawandel nach einer möglichst schnellen Umsetzung der Maßnahmen. Dorndorfs Beitrag ist hochaktuell und von hoher Relevanz, da *nature-based solutions* insbesondere von internationalen Organisationen, Geber:innen und auch dem deutschen *Bundesministerium für Umwelt, Naturschutz, nukleare Sicherheit und Verbraucherschutz* (BMUV) stark gefördert werden und gleichzeitig zunehmend dafür kritisiert werden, dass sie bestehende Umweltungerechtigkeiten verstärken können (Diep et al. 2022; Mabon et al. 2022; Newell 2022).

Eine Reihe von deutschen Städten und Gemeinden haben in den letzten Jahren Klimaschutzkonzepte bzw. Klimaanpassungsstrategien entworfen. Diese Dokumente umfassen meist eine Reihe von Handlungsfeldern, z.B. Verkehr, Gebäude, Stadtentwicklung und Energieversorgung, entlang derer sich städtisches Leben transformieren soll. **Verena Fisch, Juliane Frost und Alena Dietl** analysieren den Prozess der Erstellung des Duisburger Klimaschutzkonzepts und berücksichtigen dabei insbesondere Aspekte der Geschlechtergerechtigkeit. Die Autorinnen betonen, dass die Berücksichtigung von Genderaspekten einen entscheidenden Beitrag leisten könnte, Städte und Kommunen sozial gerechter zu gestalten. Sie verweisen aber auch darauf, dass das Konzept Duisburgs zwar die besondere Betroffenheit von Frauen gegenüber dem Klimawandel anerkennt, dabei jedoch Geschlechtergerechtigkeit nicht als explizites Ziel in der Umsetzung berücksichtigt.

**Nils Hilder und Jonas Hein** beschäftigen sich mit der Beständigkeit und den sozialökologischen Implikationen der auf permanentes Wachstum ausgerichteten Hamburger Hafenpolitik. Aufbauend auf Umweltgerechtigkeitskonzepten und dem aus der materialistischen Staatstheorie kommenden Konzept der strategischen Selektivität untersuchen Hilder und Hein den Kon-

flikt um Hafennutzung, Hafenerweiterung und Flächenvorsorge im Stadtteil Hamburg-Moorburg. Die Autoren verweisen darauf, dass die Häufung von sogenannten *environmental bads* im Stadtteil eng mit der strategischen Selektivität des Stadtstaats und der Vorrangstellung des Hafens verknüpft ist. Die Auseinandersetzungen sind dabei auch in die räumliche Produktion von Zentren und Peripherien in der Metropolregion Hamburg eingebettet, so die Autoren. Während der historische Siedlungskern der Stadt, das Hauptgeschäftszentrum und die meisten Wohngebiete sich nördlich der Elbe befinden gelten die Marschen des Süderelberaums bis heute vor allem als Landreserve für die Industrie- und Hafenentwicklung – trotz bestehender, vor allem landwirtschaftlich geprägter Landnutzungsformen und stagnierender Umschlagszahlen des Hafens.

In wachsenden Städten und Metropolregionen geraten innerstädtische Grünflächen wie Kleingartenanlagen zunehmend unter Druck. Trotz ihrer Funktion als Frischluftschneisen und Naherholungsgebiete und ihrer Relevanz für die städtische Biodiversität werden Kleingartenanlagen in vielen Städten verstärkt in neue Wohnquartiere und Gewerbegebiete umgewandelt. **David Paul Wirtz, Gianluca Cavallo und Paul Günter Schmidt** untersuchen die Narrative und die impliziten Gerechtigkeitsvorstellungen verschiedener zivilgesellschaftlicher Gruppen, die sich für den Erhalt der sogenannten *Grünen Lunge* in Frankfurt a.M. einsetzen. Die Autoren zeigen, dass Fragen der Zugänglichkeit (z.B. Wer erhält Nutzungsrechte? Wie erhält man Nutzungsrechte?) und Fragen des Eigentums von besonderer Bedeutung sind. Ihr Beitrag verdeutlicht, dass klimapolitische Ziele und die Schaffung von Wohnraum in Innenstädten mit Zielkonflikten behaftet sind.

Ländliche Räume in touristisch attraktiven Lagen werden in zunehmenden Maße Ziel von großen immobilienwirtschaftlichen Investitionen. Diese mit der weiteren Zersiedlung und Versiegelung ländlicher Räume einhergehenden Transformationsprozesse können zu starker Bodenpreissteigerung führen und insbesondere einkommensschwächere Bevölkerungsgruppen verdrängen. **Michael Mießner und Matthias Naumann** untersuchen diese, auch als ländliche Gentrifizierung beschriebenen Prozesse, anhand lokaler Konflikte im Kontext des anhaltenden Chalet-Dörfer Booms in den österreichischen Alpen. Durch die Verknüpfung von Konzepten der Gentrifizierungsforschung und Debatten zur Umweltgerechtigkeit verdeutlichen die Autoren, wie die Suche nach der grünen und gesunden ländlichen Idylle durch einkommensstarke, meist ehemals urbane Bevölkerungsgruppen und die Nachfrage nach renditenbringenden Investitionsobjekten sozialökologische Ungleichheiten

verstärkt. Die damit einhergehende beschleunigte Kommodifizierung von alpinen Landschaften kann sich dabei negativ auf die Artenvielfalt auswirken und den Hochwasserschutz gefährden.

Abschließend gibt uns **Christiane Bunge** einen tieferen Einblick in institutionelle Prozesse, die die Verankerung von Umweltgerechtigkeitsaspekten in kommunalen Politiken zum Ziel hat. Ihr Beitrag befasst sich dabei aus der in Deutschland schon lange wichtigen Perspektive des gesundheitsbezogenen Umweltschutzes mit dem Thema Umweltgerechtigkeit. Die Autorin stellt ein Erklärungskonzept vor, das lokale Umwelt, soziale Lage und Gesundheit in Beziehung setzt und illustriert anhand des Fallbeispiels Berlin, wie Umweltgerechtigkeit als integrierter Handlungsansatz verschiedene Politik- und Interventionsfelder wie Umwelt-, Natur-, Klimaschutz und Anpassung an den Klimawandel mit Strategien partizipativer Gesundheitsförderung verbinden kann. Dabei macht sie auch deutlich, wo und warum es in der Umsetzung und strukturellen Verankerung von Umweltgerechtigkeit oftmals hapert. Dabei zeigt sich, dass der Public-Health-Diskurs die Chance bietet, die Öffentlichkeit und Verwaltungen allgemeiner für Umweltgerechtigkeitsthemen zu sensibilisieren und damit neue Akzeptanz- und Umsetzungswege für Umweltgerechtigkeit zu öffnen.

## Literaturverzeichnis

- Adloff, Frank/Neckel, Sighard (2020): Gesellschaftstheorie im Anthropozän, Frankfurt: Campus Verlag.
- Agyeman, Julian/Evans, Bob (2004): »Just sustainability«: the emerging discourse of environmental justice in Britain?«, in: *Geographical Journal* 170, S. 155–164.
- Baars, Christian (2023): »Millionen Tonnen Traibhausgase durch Privatjets«, ARD-aktuell/tagesschau.de vom 12.01.2023, URL: <https://www.tagesschau.de/investigativ/ndr/privatjets-treibhausgase-klima-101.html> [abgerufen am 17.02.2023].
- Baldwin, Andrew/Bruce Erickson (2020): »Introduction: Whiteness, coloniality, and the Anthropocene«, in *Environment and Planning D: Society and Space* 38(1): S. 3–11.
- Bauriedl, Sabine/Held, Martin/Kropp, Cordula (2021): »Große Transformation zur Nachhaltigkeit: Konzeptionelle Grundlagen und Herausforderungen«, in: Sabine Hofmeister/Barbara Warner/Zora Ott (Hg.), *Nachhaltige Raum-*

- entwicklung für die große Transformation-Herausforderungen, Barrieren und Perspektiven für Raumwissenschaften und Raumplanung, Hannover: Verlag der ARL-Akademie für Raumentwicklung in der Leibniz-Gemeinschaft, S. 22–44.
- Bauriedl, Sybille/Wissen, Markus (2002): »Post-Fordist transformation, the sustainability concept and social relations with nature: A case study of the Hamburg region«, in: *Journal of environmental policy & planning* 4(2), S. 107–121.
- Biesecker, Adelheid/Hofmeister, Sabine (2013): »Zur Produktivität des ›Reproduktiven‹. Fürsorgliche Praxis als Element einer Ökonomie der Vorsorge«, in: *Feministische Studien. Zeitschrift für interdisziplinäre Frauen- und Geschlechterforschung* 31(2), S. 240–252.
- Bopp, Judith/Bercht, Anna Lena (2021): »Considering time in climate justice«, in: *Geographica Helvetica* 76(1), S. 29–46.
- Brad, Alina/Hein, Jonas (2019): »Die Transnationalisierung von Agrarkonflikten? Globale NGOs, transnationales Kapital und lokaler Widerstand in Sumatra«, in: Michael Mießner/Matthias Naumann (Hg.), *Kritische Geographien ländlicher Entwicklung, Münster in Westfalen: Westfälisches Dampfboot*, S. 116–130.
- Brad, Alina/Hein, Jonas (2022): »Towards transnational agrarian conflicts? Global NGOs, transnational agrobusiness and local struggles for land on Sumatra«, in: *New Political Economy*, S. 1–16.
- Brand, Ulrich (2016): »›Transformation‹ as a new critical orthodoxy: the strategic use of the term ›Transformation‹ does not prevent multiple crises« In: *GAIA-Ecological Perspectives for Science and Society* 25(1), S. 23–27.
- Brand, Ulrich/Görg, Christoph (2003): »The state and the regulation of biodiversity: international biopolitics and the case of Mexico«, in: *Geoforum* 34, S. 221–233.
- Brand, Ulrich/Wissen, Markus (2012). »Global environmental politics and the imperial mode of living: articulations of state-capital relations in the multiple crisis«, in: *Globalizations* 9(4), S. 547–560.
- Brand, Ulrich/Wissen, Markus (2017a): *Imperiale Lebensweisen. Zur Ausbeutung von Mensch und Natur im Globalen Kapitalismus*, München: oekom Verlag.
- Brand, Ulrich/Wissen, Markus (2017b). »Social-Ecological Transformation«, in: Douglas Richardson (Hg.), *The International Encyclopedia of Geography*, New Jersey: Wiley.



- Bruns, A. und Braun, B. (2021) Nachhaltigkeit und sozialökologische Transformation. In: Rita Schneider-Sliwa/Boris Braun/Ilse Helbrecht/Rainer Wehrhahn (Hg.), *Humangeographie*, Braunschweig: Westermann.
- Bruns, Antje (2020): »Provincializing Degrowth. Alternativen zu Entwicklung und der Globale Süden«, in: Bastian Lange/Martina Hülz/Benedikt Schmid/Christian Schulz (Hg.), *Postwachstumsgeographien. Raumbezüge diverser und alternativer Ökonomien*, Bielefeld: transcript, S. 241–256.
- Bührmann, Andrea D./Dobusch, Laura/Weller, Ines (2021): »Editorial zum Schwerpunktthema: Klimakrise, Diversität und Ungleichheitsverhältnisse: Aktuelle Wechselwirkungen und Transformationen«, in: *ZDfm-Zeitschrift für Diversitätsforschung und Management* 6(1), S. 2–7.
- Bullard, Robert D. (1994): »Environmental justice for all: It's the right thing to do«, in: *Journal of Environmental Law and Litigation* 9: S. 281.
- Christ, Michaela/Sommer, Bernd (2022): »Transformation (sozial-ökologisch)«, in: Daniela Gottschlich/Sarah Hackfort/Tobias Schmitt/Uta von Winterfeld (Hg.), *Handbuch Politische Ökologie*, Bielefeld: transcript, S. 461–467.
- Coutrot, Thomas/Gadrey, Jean (2012): »Green growth« is called into question«, ETUI Policy Brief 3/2012, Belgium: European Trade Union Institute.
- Cubillo-Guevara, Ana Patricia/Vanhulst, Julien/Hidalgo-Capitán, Antonio Luis/Beling, Aadrian (2018): »Die lateinamerikanischen Diskurse zu buen vivir. Entstehung, Institutionalisierung und Veränderung«, in: *PERIPHÉRIE* 38(149), S. 8–28.
- Cutter, Susan L. (1995): »Race, class and environmental justice«, in: *Progress in Human Geography* 19(1): S. 111–122.
- Diep, Loan/Parikh, Priti/Dos Santos Duarte, Barbara P./Bourget, Anais F./Dodman, David/Martins, Jose Rodolfo S. (2022): »It won't work here: Lessons for just nature-based stream restoration in the context of urban informality«, in: *Environmental Science & Policy* 136, S. 542–554.
- Dünckmann, Florian/Hein, Jonas/Klepp, Silja (2022): »Challenging the imperial mode of living by challenging ELSEWHERE: spatial narratives and justice«, in: *DIE ERDE – Journal of the Geographical Society of Berlin* 153(2), S. 109–115.
- Elkins, Stephan (2007): »Umweltschutz und soziale Gerechtigkeit«, in: *Vorgänge* 3, S. 26–27.
- Faber, Daniel (2017): »The political economy of environmental justice«, in: Ryan Holifield/Jayajit Chakraborty/Gordon Walker (Hg.), *The Routledge Handbook of Environmental Justice*, London/New York: Routledge, S. 61–73.

- Fiedler, Klaus (1998): »Zur Umsetzung der Agenda 21 in den Staaten und Kommunen«, in: Stefan Kuhn/Gottfried Suchy/Monika Zimmermann (Hg.), *Lokale Agenda 21—Deutschland: Kommunale Strategien für eine zukunftsbeständige Entwicklung*, Berlin/Heidelberg: Springer/Internationaler Rat für Kommunale Umweltinitiativen, S. 53–62.
- Fladvad, Benno/Hasenfratz, Martina (2020): »Einleitung: Imaginationen von Nachhaltigkeit zwischen Katastrophe, Krise und Normalisierung«, in: Frank Adloff/Benno Fladvad/Martina Hasenfratz/Sighard Neckel (Hg.), *Imaginationen von Nachhaltigkeit: Katastrophe. Krise. Normalisierung*, Frankfurt: Campus, S. 13–28.
- Flitner, Michael (2003): »Umweltgerechtigkeit. Ein neuer Ansatz der sozialwissenschaftlichen Umweltforschung«, in: Peter Meusburger/Thomas Schwan (Hg.), *Humanökologie: Ansätze zur Überwindung der Natur-Kultur-Dichotomie*, Stuttgart: Franz Steiner Verlag, S. 139–160.
- Flitner, Michael (2018): »Umweltgerechtigkeit«, in: ARL – Akademie für Raumforschung und Landesplanung (Hg.), *Handwörterbuch der Stadt- und Raumentwicklung*, Hannover: ARL – Akademie für Raumforschung und Landesplanung, S. 2685–2689.
- Fraser, Nancy (2000): »Rethinking recognition«, in: *New left review* 3, S. 107–120.
- Fricker, Miranda (2016): »Epistemic injustice and the preservation of ignorance«, in: Rick Peels/Martijn Blaauw (Hg.), *The epistemic dimensions of ignorance*, New York: Cambridge University Press, S. 160–177.
- Georgescu-Roegen, Nicholas (1971): *The Entropy Law and the Economic Process*, Cambridge/London: Harvard University Press.
- Gesing, Friederike (2022): »Mehr-als-menschliche Ansätze für die Politische Ökologie: Relationale Theorien und Konzepte«, in: Daniela Gottschlich/Sarah Hackfort/Tobias Schmidt/Uta Von Winterfeld (Hg.), *Handbuch Politische Ökologie: Theorien, Konflikte, Begriffe, Methoden*, Bielefeld: transcript, S. 107–118.
- Goldman, Mara J./Turner, Matthew D. (2011): »Introduction«, in: Mara J. Goldman/Paul Nadasdy/Matthew D. Turner (Hg.), *Knowing Nature: Conversations at the Intersection of Political Ecology and Science Studies*, Chicago/London: University of Chicago Press, S. 1–23.
- Görg, Christoph/Brand, Ulrich/Haberl, Helmut/Hummel, Diana/Jahn, Thomas/Liehr, Stefan (2017): »Challenges for social-ecological transformations: Contributions from social and political ecology«, in: *Sustainability* 9(7), 1045.

- Greening, Lorna A./Greene, David L./Difiglio, Carmen (2000): »Energy efficiency and consumption—the rebound effect- a survey«, in: *Energy policy* 28(6-7), S. 389–401.
- Haug, Sebastian (2021): »A Thirdspace approach to the ›Global South‹: insights from the margins of a popular category«, in: *Third World Quarterly* 42(9), S. 2018–2038.
- Haug, Sebastian/Braveboy-Wagner, Jacqueline/Maihold, Günther (2021): »The ›Global South‹ in the study of world politics: examining a meta category«, in: *Third World Quarterly* 42(9), S. 1923–1944.
- Hein, Jonas (2019): *Political ecology of REDD+ in Indonesia: Agrarian conflicts and forest carbon*, Abingdon/New York: Routledge.
- Hein, Jonas/Dünckmann, Florian (2020): »Narratives and practices of environmental justice«, in: *DIE ERDE—Journal of the Geographical Society of Berlin* 151(2-3), S. 59–66.
- Hein, Jonas/Thomsen, Jannes (2023): »Contested estuary ontologies: The conflict over the fairway adaptation of the Elbe River, Germany«, in: *Environment and Planning E: Nature and Space* 6(1), S. 153–177.
- Hein, Wolfgang (1998): *Unterentwicklung—Krise der Peripherie: Phänomene—Theorien—Strategien*, Wiesbaden: Springer-Verlag.
- Herbeck, Johannes/Flitner, Michael (2010): » ›A new enemy out there‹: der Klimawandel als Sicherheitsproblem«, in: *Geographica Helvetica* 65(3), S. 198–206.
- Hinchliffe, Steve (2007): *Geographies of Nature. Societies, Environments, Ecologies*, Los Angeles/London/New Delhi/Singapore: Sage Publications.
- Hofmeister, Sabine/Warner, Barbara (2021). »Einführung«, in: Sabine Hofmeister/Barbara Warner/Zora Ott (Hg.), *Nachhaltige Raumentwicklung für die große Transformation-Herausforderungen, Barrieren und Perspektiven für Raumwissenschaften und Raumplanung*, Hannover: Verlag der ARL-Akademie für Raumentwicklung in der Leibniz-Gemeinschaft, S. 7–21.
- Horstmann, Britta/Hein, Jonas (2017): *Aligning climate change mitigation and sustainable development under the UNFCCC: A critical assessment of the Clean Development Mechanism, the Green Climate Fund and REDD+*. Bonn: Deutsches Institut für Entwicklungspolitik.
- Hultman, Martin/Pulé, Paul M. (2018): *Ecological Masculinities. Theoretical Foundations and Practical Guidance*, London: Routledge.
- Jessop, Bob (1999): »The strategic selectivity of the state: Reflections on a theme of Poulantzas«, in: *Journal of the Hellenic Diaspora* 25, S. 1–37.

- Kalt, Tobias (2022): »Agents of transition or defenders of the status quo? Trade union strategies in green transitions«, in: *Journal of Industrial Relations* 64, S. 499–521.
- Klepp, Silja/Chavez-Rodriguez, Libertad (2018): *A Critical Approach to Climate Change Adaptation: Discourses, Policies, and Practices*. Routledge Series: Routledge Advances in Climate Change Research, London/New York: Routledge.
- Klepp, Silja/Fröhlich, Christiane (2020): »Migration and Conflict in a Global Warming Era: A Political Understanding of Climate Change«, in: *Social Sciences* 9(5), S. 78.
- Klepp, Silja/Fünfgeld, Hartmut (2022): »Tackling knowledge and power: an environmental justice perspective on climate change adaptation in Kiribati«, in: *Climate and Development* 14(8), S. 757–769.
- Klepp, Silja/Hein, Jonas (2021): »Wissen in der Klimapolitik: Ermöglichen Perspektiven der Umweltgerechtigkeit faire Klimamaßnahmen?«, in: *Geographische Rundschau* 73(6), S. 22–27.
- Köckler, Heike/Sieber, Raphael (2020): »Die Stadt als gesunder Lebensort?!« in: *Bundesgesundheitsblatt – Gesundheitsforschung – Gesundheitsschutz* 63, S. 928–935.
- Krause, Dunja/Stevis, Dimitris/Hujo, Katja/Morena, Edouard (2022): »Just transitions for a new eco-social contract: analysing the relations between welfare regimes and transition pathways«, in: *Transfer: European Review of Labour and Research* 28(3), S. 367–382.
- Lange, Bastian/Hülz, Martina/Schmid, Benedikt/Schulz, Christian (Hg.) (2020): *Postwachstumsgeographien: Raumbezüge diverser und alternativer Ökonomien*, Bielefeld: transcript.
- Laux, Henning (2020): »Grundrisse einer Theorie der gesellschaftlichen CO<sub>2</sub>-Verhältnisse«, in: Frank Adloff/Sighard Neckel (Hg.), *Gesellschaftstheorie im Anthropozän*, Frankfurt: Campus Verlag, S. 123–157.
- Lerner, Steve (2012): *Sacrifice zones: the front lines of toxic chemical exposure in the United States*, Massachusetts: MIT Presse.
- Mabon, Leslie/Barkved, Line/De Bruin, Karianne/Shih, Wan-Yu (2022): »Whose knowledge counts in nature-based solutions? Understanding epistemic justice for nature-based solutions through a multi-city comparison across Europe and Asia«, in: *Environmental Science & Policy* 136, S. 652–664.
- Mendes Barbosa, Luciana/Walker, Gordon (2020): »Epistemic injustice, risk mapping and climatic events: analysing epistemic resistance in the con-

- text of favela removal in Rio de Janeiro«, in: *Geographica Helvetica* 75, S. 381–391.
- Merten, Jennifer/Nielsen, Jonas Ø./Faust, Heiko (2021): »Climate change mitigation on tropical peatlands: A triple burden for smallholder farmers in Indonesia«, in: *Global Environmental Change* 71, 102388.
- De Moor, List/Uba, Katrin/Wahlström, Mattias/Wennerhag, Magnus/De Vydt, Michiel (2020): Protest for a future II: Composition, mobilization and motives of the participants in Fridays For Future climate protests on 20–27 September, 2019, in 19 cities around the world, o.O.: Swedish Research Council for Sustainable Development, URL: <https://protestinstitut.eu/wp-content/uploads/2020/02/Protest-for-a-Future-II-2020-02-24.pdf> [abgerufen am 10.02.2023].
- Morena, Edouard/Krause, Dunja/Stevis, Dimitris (2020a): »Introduction: the genealogy and contemporary politics of just transitions«, in: Edouard Morena./Dunja Krause/Dimitris Stevis (Hg.), *Just Transitions. Social Justice in a Low-Carbon World*, London: Pluto Press, S. 1–31.
- Morena, Edouard/Krause, Dunja/Stevis, Dimitris (2020b): *Just Transitions. Social Justice in a Low-Carbon World*, London: Pluto Press.
- Müller, Franziska/Tunn, Johanna/Kalt, Tobias (2022): »Hydrogen Justice«, in: *Environmental Research Letters* 17(11), 115006.
- Muraca, Barbara (2020): »Für eine Dekolonisierung des Anthropozändiskurses: Diagnosen, Protagonisten, Transformationsszenarien«, in: Frank Adloff/Sighard Neckel (Hg.), *Gesellschaftstheorie im Anthropozän*, Frankfurt: Campus Verlag.
- Newell, Peter (2022): »Climate justice«, in: *The Journal of Peasant Studies* 49(5), S. 915–923.
- Nightingale, Andrea J./Eriksen, Siri/Taylor, Marcus/Forsyth, Timothy/Pelling, Mark/Newsham, Andrew/Boyd, Emily/Brown, Katrina/Harvey, Blane/Jones, Lindsey/Kerr, Rachel Bezner/Mehta, Lyla/Naess, Lars Otto/Ockwell, David/Scoones, Ian/Tanner, Thomas/Whitfield, Stephen (2020): »Beyond technical fixes: Climate solutions and the great derangement«, in: *Climate and Development* 12(4), S. 343–352.
- Nightingale, Andrea J./Karlsson, Linus/Böhler, Tom/Campbell, Ben (2019): »Narratives of Sustainability. Key Concepts and Issues«, in: Andrea Nightingale (Hg.), *Environment and Sustainability in a Globalizing World*, New York: Routledge, S. 35–55.
- Peet, Richard/Robbins, Paul/Watts, Michael (2011): *Global political ecology*, Abingdon/New York: Routledge.

- Pohle, Perdita/Brönnner, Maximilian/Gerique, Andres/Kieslinger, Julia/Lederer, Lauritz (2021): »Rechtliche und politische Rahmenbedingungen als Grundlage für sozial-ökologische Transformationen. Die Themenfelder Nachhaltigkeit, ländliche Räume, Klima- und Gewässerschutz, Biodiversität, Wald, Landwirtschaft und Energie«, in: Mitteilungen der Fränkischen Geographischen Gesellschaft 67, S. 117–175.
- Pottier, Antonin/Méjean, Aurélie/Godard, Olivier/Hourcade, Jean-Charles (2017): »A Survey of Global Climate Justice: From Negotiation Stances to Moral Stakes and Back«, in: International Review of Environmental and Resource Economics 11(1), S. 1–53.
- Poulantzas, Nicos (1978): Staatstheorie, Hamburg: VSA-Verlag.
- Purucker, David (2021): »Critical environmental justice and the state: a critique of Pellow«, in: Environmental Sociology 7, S. 176–186.
- Raddatz, Liv/Mennis, Jeremy (2013): »Environmental justice in Hamburg, Germany«, in: The Professional Geographer 65, S. 495–511.
- Von Redecker, Eva (2020): Revolution für das Leben. Philosophie der neuen Protestformen, Frankfurt a.M.: S. Fischer Verlag.
- Rehling, Julia/Bunge, Christiane/Waldhauer, Julia/Conrad, André (2021): »Socioeconomic Differences in Walking Time of Children and Adolescents to Public Green Spaces in Urban Areas—Results of the German Environmental Survey (2014–2017)«, in: International Journal of Environmental Research and Public Health 18(5), S. 2326.
- Rockström, Johan/Steffen, Will/Noone, Kevin/Persson, Åsa/Chapin, F. Stuart/Lambin, Eric F./Lenton, Timothy M./Scheffer, Marten/Folke, Carl/Schellnhuber, Hans J./Nykvist, Björn/De Wit, Cynthia A./Hughes, Terry/van der Leeuw, Sander/Rodhe, Henning/Sörlin, Sverker/Snyder, Peter K./Costanza, Robert/Svedin, Uno/Falkenmark, Malin/Karlberg, Louise/Corell, Robert W./Fabry, Victoria J./Hansen, James/Walker, Brian/Liverman, Diana/Richardson, Katherine/Crutzen, Paul/Foley, Jonathan A. (2009): »A safe operating space for humanity«, in: Nature 461, S. 472–475.
- Röhr, Ulrike/Weller, Ines (2021): »Zum Umgehen von und Umgang mit Ungleichheiten in der Klimapolitik und der Forschung für eine klimafreundlichere Gestaltung des Alltags«, in: ZDfm–Zeitschrift für Diversitätsforschung und -management 6(1), S. 23–38.
- Rosa, Hartmut (2016): Resonanz: Eine Soziologie der Weltbeziehung, Frankfurt: Suhrkamp.

- Rüttenauer, Tobias (2018): »Neighbours matter: A nation-wide small-area assessment of environmental inequality in Germany«, in: *Social Science Research* 70, S. 198–211.
- Sander, Hendrik/Weißermel, Sören (2023): »Urban heat transition in Berlin: Corporate strategies, political conflicts, and just solutions«, in: *Urban Planning* 8(1), S. 361–371.
- Schlosberg, David (2004): »Reconceiving environmental justice: global movements and political theories«, in: *Environmental Politics* 13, S. 517–540.
- Schlosberg, David (2007): *Defining environmental justice: Theories, movements, and nature*, Oxford: Oxford University Press.
- Schlosberg, David/Collins, Lisette B. (2014): »From environmental to climate justice: climate change and the discourse of environmental justice«, in: *Wiley Interdisciplinary Review: Climate* 5, S. 359–374.
- Schulz, Hans Dieter/Warner, Barbara (2021): »Zur (Neu-)Ausrichtung der Raumentwicklung für eine auf Nachhaltigkeit zielende Transformation«, in: Sabine Hofmeister/Barbara Warner/Zora Ott (Hg.), *Nachhaltige Raumentwicklung für die große Transformation-Herausforderungen, Barrieren und Perspektiven für Raumwissenschaften und Raumplanung*, Hannover: Verlag der ARL-Akademie für Raumentwicklung in der Leibniz-Gemeinschaft, S. 45–75.
- Schulze, Svenja (2022): »Just Transition: Den Übergang zu einer klimagerechten Wirtschafts- und Lebensweise gestalten«, Bundesministerin für wirtschaftliche Zusammenarbeit und Entwicklung (BMZ), URL: <https://www.bmz.de/de/themen/klimawandel-und-entwicklung/just-transition> [abgerufen am 10.02.2023].
- Sommer, Bernd/Welzer, Harald (2014): *Transformationsdesign. Wege in eine zukunftsfähige Moderne*, München: oekom.
- Stavis, Dimitris/Felli, Romain (2015): »Global labour unions and just transition to a green economy«, in: *International Environmental Agreements: Politics, Law and Economics* 15, S. 29–43.
- Stavis, Dimitris/Felli, Romain (2020): »Planetary just transition? How inclusive and how just?«, in: *Earth System Governance* 6, 100065.
- Swilling, Mark/Anneck, Eve (2012): *Just transitions: Explorations of sustainability in an unfair world*, Tokyo: United Nations University Press.
- Swyngedouw, Erik/Heynen, Nikolas. C. (2003): »Urban political ecology, justice and the politics of scale«, in: *Antipode* 35(5), S. 898–918.

- Ulgianti, Sergio (2015): »Entropy«, in: Giacomo D'Alisa/Federico Demaria/Giorgios Kallis (Hg.), *Degrowth: a vocabulary for a new era*, New York/London: Routledge, S. 125–127.
- UNDP (2020): *The next frontier—human development and the Anthropocene: UNDP human development report 2020*, New York: United Nations Development Programme, URL: <https://www.undp.org/belarus/publications/next-frontier-human-development-and-anthropocene> [abgerufen am 17.02.2023].
- United Nations Research Institute for Social Development (UNRISD) (2020): »Just Transition Research Collaborative (Phase III): Working Towards Transformative Change and Climate Justice for All«, URL: <https://www.unrisd.org/en/research/projects/just-transition-research-collaborative-phase-iii-working-towards-transformative-change-and-climate-j> [abgerufen am 10.02.2023].
- Walker, Gordon (2012): *Environmental Justice: Concepts, Evidence and Politics*, London: Routledge.
- Warner, Barbara/Hofmeister, Sabine/Malburg-Graf, Barbara/Kropp, Cordula (2021): »Nachhaltige Raumentwicklung für die große Transformation – Zusammenführende Diskussion und Schlussfolgerungen«, in: Sabine Hofmeister/Barbara Warner/Zora Ott (Hg.), *Nachhaltige Raumentwicklung für die große Transformation-Herausforderungen, Barrieren und Perspektiven für Raumwissenschaften und Raumplanung*, Hannover: Verlag der ARL-Akademie für Raumentwicklung in der Leibniz-Gemeinschaft, S. 214–233.
- Wissenschaftlicher Beirat der Bundesregierung Globale Umweltveränderungen (WBGU) (2011): *Welt im Wandel – Gesellschaftsvertrag für eine Große Transformation* [Hauptgutachten], Berlin: Eigenverlag.
- Wittmayer, Julia/Hölscher, Katharina (2017): *Transformationsforschung, Definitionen, Ansätze, Methoden (=Texte, 103/2017)*, Dessau: Umweltbundesamt.
- Žižek, Slavoj (2012): *The year of dreaming dangerously*, London/New York: Verso.

## Anmerkung

<sup>1</sup> Wir greifen auf die Begriffe »globaler Norden« und »globaler Süden« zurück, auch wenn dieses Begriffspaar aus unserer Sicht problembehaftet ist.



Der ›globale Norden‹ umfasst im Wesentlichen einen Raum, der sich durch einen höheren Wohlstand auszeichnet und die Länder Europas, Nordamerikas und die sogenannten entwickelten Länder Ostasiens umfasst. Der ›globale Süden‹ wird vereinfacht als der ärmere Teil der Welt gefasst und umfasst im Wesentlichen viele ehemalige Kolonien der südlichen Hemisphäre (Haug/Braveboy-Wagner/Maihold 2021). Kritisch anzumerken ist, dass das Begriffspaar suggeriert, dass es sich um jeweils homogene Räume handelt. So werden Gemeinsamkeiten zwischen Norden und Süden und auch die soziale Ungleichheit innerhalb der beiden Räume ausgeblendet. Der Begriff ›globaler Süden‹ wird dabei zunehmend auch allgemeiner als eine Metapher für soziökonomisch marginalisierte Räume aufgefasst (Haug 2021). So werden privilegierte Räume im vermeintlichen Süden auch als »Norden im Süden« oder andersherum marginalisierte Räume im Norden als »Süden im Norden« bezeichnet (Haug 2021). Der Begriff ›globaler Süden‹ steht aber auch für verschiedene interregionale Allianzen von ehemaligen Kolonien (z.B. Bandung Konferenz, G77) und für verschiedene »Widerstandsräume« (Haug/Braveboy-Wagner/Maihold 2021) gegen eine durch den Norden dominierte Weltordnung und den neoliberalen Kapitalismus.
